# Supplementary material for: Economic evaluation for medical artificial intelligence: accuracy vs. cost-effectiveness in a diabetic retinopathy screening case
Source: PubMed Central journal article supplement (PMC10881978; doi:10.1038/s41746-024-01032-9), 2024-02-21
Supplement: 41746_2024_1032_MOESM1_ESM.pdf [file 41746_2024_1032_MOESM1_ESM.pdf]

## Supplementary Information

|                                                                                                                                                                          |           |
|--------------------------------------------------------------------------------------------------------------------------------------------------------------------------|-----------|
| <b><i>Supplementary Tables</i></b>                                                                                                                                       | <b>2</b>  |
| Supplementary Table 1. Costs, effectiveness, model thresholds and performances of 1,100 screening scenarios                                                              | 2         |
| Supplementary Table 2. One-way sensitivity analysis of intervention scenarios compared with the lower-cost non-dominated scenario with varying main sensitive parameters | 29        |
| Supplementary Table 3. Cost-effectiveness of AI-based DR screening with different model performance in rural and urban settings                                          | 30        |
| Supplementary Table 4. Cost-effectiveness of AI-based DR screening with different model performance in different age groups                                              | 31        |
| Supplementary Table 5. Criteria for quality control and DR grading according to the NHS guidelines                                                                       | 33        |
| Supplementary Table 6. Parameter values for the cost-effectiveness analysis model                                                                                        | 34        |
| Supplementary Table 7. Screening costs associated with AI-based DR screening                                                                                             | 36        |
| Supplementary Table 8. Details of medical costs and care for blindness                                                                                                   | 37        |
| Supplementary Table 9. Model parameters for rural and urban settings                                                                                                     | 38        |
| Supplementary Table 10. Detailed screening and medical-related costs in rural and urban settings                                                                         | 39        |
| <b><i>Supplementary Figures</i></b>                                                                                                                                      | <b>41</b> |
| Supplementary Figure 1. ROC and optimal cut-off point of the AI in detecting referable DR                                                                                | 41        |
| Supplementary Figure 2. Workflow of selecting cost-saving and cost-effective scenarios                                                                                   | 42        |
| Supplementary Figure 3. Cost-effective analysis under 1,100 different performances of the AI                                                                             | 43        |
| Supplementary Figure 4. Cost-effectiveness acceptability curve for screening strategies with different AI model performances                                             | 44        |
| Supplementary Figure 5. Markov model                                                                                                                                     | 46        |
| Supplementary Figure 6. Threshold adjustment of the AI: an example                                                                                                       | 47        |
| <b><i>References</i></b>                                                                                                                                                 | <b>48</b> |

## Supplementary Tables

**Supplementary Table 1. Costs, effectiveness, model thresholds and performances of 1,100 screening scenarios**

| No. | R0 | R1 | R2 | R3  | R4  | Sensitivity | Specificity | Cost  | Effect |
|-----|----|----|----|-----|-----|-------------|-------------|-------|--------|
| 1   | 0  | 0  | 0  | 0   | 0   | 0.962       | 0.807       | 6,270 | 9.1721 |
| 2   | 0  | 0  | 0  | 0   | 0.1 | 0.962       | 0.807       | 6,270 | 9.1721 |
| 3   | 0  | 0  | 0  | 0   | 0.2 | 0.962       | 0.807       | 6,270 | 9.1721 |
| 4   | 0  | 0  | 0  | 0   | 0.3 | 0.962       | 0.807       | 6,270 | 9.1721 |
| 5   | 0  | 0  | 0  | 0   | 0.4 | 0.961       | 0.808       | 6,270 | 9.1721 |
| 6   | 0  | 0  | 0  | 0   | 0.5 | 0.961       | 0.810       | 6,268 | 9.1720 |
| 7   | 0  | 0  | 0  | 0   | 0.6 | 0.959       | 0.813       | 6,266 | 9.1718 |
| 8   | 0  | 0  | 0  | 0   | 0.7 | 0.957       | 0.815       | 6,264 | 9.1716 |
| 9   | 0  | 0  | 0  | 0   | 0.8 | 0.955       | 0.818       | 6,262 | 9.1714 |
| 10  | 0  | 0  | 0  | 0   | 0.9 | 0.952       | 0.820       | 6,260 | 9.1711 |
| 11  | 0  | 0  | 0  | 0.1 | 0   | 0.962       | 0.807       | 6,270 | 9.1721 |
| 12  | 0  | 0  | 0  | 0.1 | 0.1 | 0.962       | 0.807       | 6,270 | 9.1721 |
| 13  | 0  | 0  | 0  | 0.1 | 0.2 | 0.962       | 0.807       | 6,270 | 9.1721 |
| 14  | 0  | 0  | 0  | 0.1 | 0.3 | 0.962       | 0.807       | 6,270 | 9.1721 |
| 15  | 0  | 0  | 0  | 0.1 | 0.4 | 0.961       | 0.808       | 6,270 | 9.1721 |
| 16  | 0  | 0  | 0  | 0.1 | 0.5 | 0.961       | 0.810       | 6,268 | 9.1720 |
| 17  | 0  | 0  | 0  | 0.1 | 0.6 | 0.959       | 0.813       | 6,266 | 9.1718 |
| 18  | 0  | 0  | 0  | 0.1 | 0.7 | 0.957       | 0.815       | 6,264 | 9.1716 |
| 19  | 0  | 0  | 0  | 0.1 | 0.8 | 0.955       | 0.818       | 6,262 | 9.1714 |
| 20  | 0  | 0  | 0  | 0.1 | 0.9 | 0.952       | 0.820       | 6,260 | 9.1711 |
| 21  | 0  | 0  | 0  | 0.2 | 0   | 0.962       | 0.807       | 6,270 | 9.1721 |
| 22  | 0  | 0  | 0  | 0.2 | 0.1 | 0.962       | 0.807       | 6,270 | 9.1721 |
| 23  | 0  | 0  | 0  | 0.2 | 0.2 | 0.962       | 0.807       | 6,270 | 9.1721 |
| 24  | 0  | 0  | 0  | 0.2 | 0.3 | 0.962       | 0.807       | 6,270 | 9.1721 |
| 25  | 0  | 0  | 0  | 0.2 | 0.4 | 0.961       | 0.808       | 6,270 | 9.1721 |
| 26  | 0  | 0  | 0  | 0.2 | 0.5 | 0.961       | 0.810       | 6,268 | 9.1720 |
| 27  | 0  | 0  | 0  | 0.2 | 0.6 | 0.959       | 0.813       | 6,266 | 9.1718 |
| 28  | 0  | 0  | 0  | 0.2 | 0.7 | 0.957       | 0.815       | 6,264 | 9.1716 |
| 29  | 0  | 0  | 0  | 0.2 | 0.8 | 0.955       | 0.818       | 6,262 | 9.1713 |
| 30  | 0  | 0  | 0  | 0.2 | 0.9 | 0.952       | 0.820       | 6,260 | 9.1711 |
| 31  | 0  | 0  | 0  | 0.3 | 0   | 0.962       | 0.807       | 6,270 | 9.1721 |
| 32  | 0  | 0  | 0  | 0.3 | 0.1 | 0.962       | 0.807       | 6,270 | 9.1721 |
| 33  | 0  | 0  | 0  | 0.3 | 0.2 | 0.962       | 0.807       | 6,270 | 9.1721 |
| 34  | 0  | 0  | 0  | 0.3 | 0.3 | 0.962       | 0.807       | 6,270 | 9.1721 |
| 35  | 0  | 0  | 0  | 0.3 | 0.4 | 0.961       | 0.808       | 6,270 | 9.1721 |
| 36  | 0  | 0  | 0  | 0.3 | 0.5 | 0.961       | 0.810       | 6,268 | 9.1720 |
| 37  | 0  | 0  | 0  | 0.3 | 0.6 | 0.959       | 0.813       | 6,266 | 9.1718 |

|    |   |   |   |     |     |       |       |       |        |
|----|---|---|---|-----|-----|-------|-------|-------|--------|
| 38 | 0 | 0 | 0 | 0.3 | 0.7 | 0.957 | 0.815 | 6,264 | 9.1716 |
| 39 | 0 | 0 | 0 | 0.3 | 0.8 | 0.955 | 0.818 | 6,262 | 9.1713 |
| 40 | 0 | 0 | 0 | 0.3 | 0.9 | 0.952 | 0.820 | 6,260 | 9.1710 |
| 41 | 0 | 0 | 0 | 0.4 | 0   | 0.962 | 0.807 | 6,270 | 9.1721 |
| 42 | 0 | 0 | 0 | 0.4 | 0.1 | 0.962 | 0.807 | 6,270 | 9.1721 |
| 43 | 0 | 0 | 0 | 0.4 | 0.2 | 0.962 | 0.807 | 6,270 | 9.1721 |
| 44 | 0 | 0 | 0 | 0.4 | 0.3 | 0.962 | 0.808 | 6,270 | 9.1721 |
| 45 | 0 | 0 | 0 | 0.4 | 0.4 | 0.961 | 0.808 | 6,270 | 9.1721 |
| 46 | 0 | 0 | 0 | 0.4 | 0.5 | 0.960 | 0.810 | 6,268 | 9.1720 |
| 47 | 0 | 0 | 0 | 0.4 | 0.6 | 0.958 | 0.813 | 6,266 | 9.1717 |
| 48 | 0 | 0 | 0 | 0.4 | 0.7 | 0.957 | 0.815 | 6,264 | 9.1716 |
| 49 | 0 | 0 | 0 | 0.4 | 0.8 | 0.955 | 0.818 | 6,262 | 9.1713 |
| 50 | 0 | 0 | 0 | 0.4 | 0.9 | 0.952 | 0.820 | 6,260 | 9.1710 |
| 51 | 0 | 0 | 0 | 0.5 | 0   | 0.962 | 0.808 | 6,270 | 9.1721 |
| 52 | 0 | 0 | 0 | 0.5 | 0.1 | 0.962 | 0.808 | 6,270 | 9.1721 |
| 53 | 0 | 0 | 0 | 0.5 | 0.2 | 0.962 | 0.808 | 6,270 | 9.1721 |
| 54 | 0 | 0 | 0 | 0.5 | 0.3 | 0.962 | 0.808 | 6,270 | 9.1721 |
| 55 | 0 | 0 | 0 | 0.5 | 0.4 | 0.961 | 0.808 | 6,270 | 9.1720 |
| 56 | 0 | 0 | 0 | 0.5 | 0.5 | 0.960 | 0.810 | 6,268 | 9.1719 |
| 57 | 0 | 0 | 0 | 0.5 | 0.6 | 0.958 | 0.813 | 6,266 | 9.1717 |
| 58 | 0 | 0 | 0 | 0.5 | 0.7 | 0.957 | 0.815 | 6,264 | 9.1716 |
| 59 | 0 | 0 | 0 | 0.5 | 0.8 | 0.954 | 0.818 | 6,262 | 9.1713 |
| 60 | 0 | 0 | 0 | 0.5 | 0.9 | 0.952 | 0.820 | 6,260 | 9.1710 |
| 61 | 0 | 0 | 0 | 0.6 | 0   | 0.961 | 0.808 | 6,270 | 9.1721 |
| 62 | 0 | 0 | 0 | 0.6 | 0.1 | 0.961 | 0.808 | 6,270 | 9.1721 |
| 63 | 0 | 0 | 0 | 0.6 | 0.2 | 0.961 | 0.808 | 6,270 | 9.1721 |
| 64 | 0 | 0 | 0 | 0.6 | 0.3 | 0.961 | 0.808 | 6,270 | 9.1721 |
| 65 | 0 | 0 | 0 | 0.6 | 0.4 | 0.961 | 0.808 | 6,269 | 9.1720 |
| 66 | 0 | 0 | 0 | 0.6 | 0.5 | 0.960 | 0.810 | 6,268 | 9.1719 |
| 67 | 0 | 0 | 0 | 0.6 | 0.6 | 0.958 | 0.813 | 6,266 | 9.1717 |
| 68 | 0 | 0 | 0 | 0.6 | 0.7 | 0.957 | 0.815 | 6,264 | 9.1715 |
| 69 | 0 | 0 | 0 | 0.6 | 0.8 | 0.954 | 0.818 | 6,262 | 9.1713 |
| 70 | 0 | 0 | 0 | 0.6 | 0.9 | 0.951 | 0.820 | 6,260 | 9.1710 |
| 71 | 0 | 0 | 0 | 0.7 | 0   | 0.961 | 0.808 | 6,270 | 9.1721 |
| 72 | 0 | 0 | 0 | 0.7 | 0.1 | 0.961 | 0.808 | 6,270 | 9.1721 |
| 73 | 0 | 0 | 0 | 0.7 | 0.2 | 0.961 | 0.808 | 6,270 | 9.1721 |
| 74 | 0 | 0 | 0 | 0.7 | 0.3 | 0.961 | 0.808 | 6,270 | 9.1721 |
| 75 | 0 | 0 | 0 | 0.7 | 0.4 | 0.961 | 0.808 | 6,269 | 9.1720 |
| 76 | 0 | 0 | 0 | 0.7 | 0.5 | 0.960 | 0.810 | 6,268 | 9.1719 |
| 77 | 0 | 0 | 0 | 0.7 | 0.6 | 0.958 | 0.813 | 6,266 | 9.1717 |
| 78 | 0 | 0 | 0 | 0.7 | 0.7 | 0.956 | 0.815 | 6,264 | 9.1715 |
| 79 | 0 | 0 | 0 | 0.7 | 0.8 | 0.954 | 0.818 | 6,262 | 9.1713 |

|     |   |   |     |     |     |       |       |       |        |
|-----|---|---|-----|-----|-----|-------|-------|-------|--------|
| 80  | 0 | 0 | 0   | 0.7 | 0.9 | 0.951 | 0.820 | 6,260 | 9.1710 |
| 81  | 0 | 0 | 0   | 0.8 | 0   | 0.961 | 0.808 | 6,270 | 9.1721 |
| 82  | 0 | 0 | 0   | 0.8 | 0.1 | 0.961 | 0.808 | 6,270 | 9.1721 |
| 83  | 0 | 0 | 0   | 0.8 | 0.2 | 0.961 | 0.808 | 6,270 | 9.1721 |
| 84  | 0 | 0 | 0   | 0.8 | 0.3 | 0.961 | 0.808 | 6,270 | 9.1721 |
| 85  | 0 | 0 | 0   | 0.8 | 0.4 | 0.961 | 0.808 | 6,269 | 9.1720 |
| 86  | 0 | 0 | 0   | 0.8 | 0.5 | 0.960 | 0.810 | 6,268 | 9.1719 |
| 87  | 0 | 0 | 0   | 0.8 | 0.6 | 0.958 | 0.813 | 6,266 | 9.1717 |
| 88  | 0 | 0 | 0   | 0.8 | 0.7 | 0.956 | 0.815 | 6,264 | 9.1715 |
| 89  | 0 | 0 | 0   | 0.8 | 0.8 | 0.954 | 0.818 | 6,262 | 9.1713 |
| 90  | 0 | 0 | 0   | 0.8 | 0.9 | 0.951 | 0.820 | 6,260 | 9.1710 |
| 91  | 0 | 0 | 0   | 0.9 | 0   | 0.961 | 0.808 | 6,270 | 9.1721 |
| 92  | 0 | 0 | 0   | 0.9 | 0.1 | 0.961 | 0.808 | 6,270 | 9.1721 |
| 93  | 0 | 0 | 0   | 0.9 | 0.2 | 0.961 | 0.808 | 6,270 | 9.1721 |
| 94  | 0 | 0 | 0   | 0.9 | 0.3 | 0.961 | 0.808 | 6,270 | 9.1721 |
| 95  | 0 | 0 | 0   | 0.9 | 0.4 | 0.961 | 0.808 | 6,269 | 9.1720 |
| 96  | 0 | 0 | 0   | 0.9 | 0.5 | 0.960 | 0.810 | 6,268 | 9.1719 |
| 97  | 0 | 0 | 0   | 0.9 | 0.6 | 0.958 | 0.813 | 6,265 | 9.1717 |
| 98  | 0 | 0 | 0   | 0.9 | 0.7 | 0.956 | 0.815 | 6,264 | 9.1715 |
| 99  | 0 | 0 | 0   | 0.9 | 0.8 | 0.954 | 0.818 | 6,262 | 9.1713 |
| 100 | 0 | 0 | 0   | 0.9 | 0.9 | 0.951 | 0.820 | 6,260 | 9.1710 |
| 101 | 0 | 0 | 0.1 | 0   | 0   | 0.962 | 0.807 | 6,270 | 9.1721 |
| 102 | 0 | 0 | 0.1 | 0   | 0.1 | 0.962 | 0.807 | 6,270 | 9.1721 |
| 103 | 0 | 0 | 0.1 | 0   | 0.2 | 0.962 | 0.807 | 6,270 | 9.1721 |
| 104 | 0 | 0 | 0.1 | 0   | 0.3 | 0.962 | 0.807 | 6,270 | 9.1721 |
| 105 | 0 | 0 | 0.1 | 0   | 0.4 | 0.961 | 0.808 | 6,270 | 9.1721 |
| 106 | 0 | 0 | 0.1 | 0   | 0.5 | 0.961 | 0.810 | 6,268 | 9.1720 |
| 107 | 0 | 0 | 0.1 | 0   | 0.6 | 0.959 | 0.813 | 6,266 | 9.1718 |
| 108 | 0 | 0 | 0.1 | 0   | 0.7 | 0.957 | 0.815 | 6,264 | 9.1716 |
| 109 | 0 | 0 | 0.1 | 0   | 0.8 | 0.955 | 0.818 | 6,262 | 9.1714 |
| 110 | 0 | 0 | 0.1 | 0   | 0.9 | 0.952 | 0.821 | 6,259 | 9.1710 |
| 111 | 0 | 0 | 0.1 | 0.1 | 0   | 0.962 | 0.807 | 6,270 | 9.1721 |
| 112 | 0 | 0 | 0.1 | 0.1 | 0.1 | 0.962 | 0.807 | 6,270 | 9.1721 |
| 113 | 0 | 0 | 0.1 | 0.1 | 0.2 | 0.962 | 0.807 | 6,270 | 9.1721 |
| 114 | 0 | 0 | 0.1 | 0.1 | 0.3 | 0.962 | 0.807 | 6,270 | 9.1721 |
| 115 | 0 | 0 | 0.1 | 0.1 | 0.4 | 0.961 | 0.808 | 6,270 | 9.1721 |
| 116 | 0 | 0 | 0.1 | 0.1 | 0.5 | 0.961 | 0.810 | 6,268 | 9.1720 |
| 117 | 0 | 0 | 0.1 | 0.1 | 0.6 | 0.959 | 0.813 | 6,266 | 9.1718 |
| 118 | 0 | 0 | 0.1 | 0.1 | 0.7 | 0.957 | 0.815 | 6,264 | 9.1716 |
| 119 | 0 | 0 | 0.1 | 0.1 | 0.8 | 0.955 | 0.818 | 6,262 | 9.1714 |
| 120 | 0 | 0 | 0.1 | 0.1 | 0.9 | 0.950 | 0.821 | 6,259 | 9.1709 |
| 121 | 0 | 0 | 0.1 | 0.2 | 0   | 0.962 | 0.807 | 6,270 | 9.1721 |

|     |   |   |     |     |     |       |       |       |        |
|-----|---|---|-----|-----|-----|-------|-------|-------|--------|
| 122 | 0 | 0 | 0.1 | 0.2 | 0.1 | 0.962 | 0.807 | 6,270 | 9.1721 |
| 123 | 0 | 0 | 0.1 | 0.2 | 0.2 | 0.962 | 0.807 | 6,270 | 9.1721 |
| 124 | 0 | 0 | 0.1 | 0.2 | 0.3 | 0.962 | 0.807 | 6,270 | 9.1721 |
| 125 | 0 | 0 | 0.1 | 0.2 | 0.4 | 0.961 | 0.808 | 6,270 | 9.1721 |
| 126 | 0 | 0 | 0.1 | 0.2 | 0.5 | 0.961 | 0.810 | 6,268 | 9.1720 |
| 127 | 0 | 0 | 0.1 | 0.2 | 0.6 | 0.959 | 0.813 | 6,266 | 9.1718 |
| 128 | 0 | 0 | 0.1 | 0.2 | 0.7 | 0.957 | 0.815 | 6,264 | 9.1716 |
| 129 | 0 | 0 | 0.1 | 0.2 | 0.8 | 0.954 | 0.818 | 6,262 | 9.1713 |
| 130 | 0 | 0 | 0.1 | 0.2 | 0.9 | 0.949 | 0.821 | 6,259 | 9.1707 |
| 131 | 0 | 0 | 0.1 | 0.3 | 0   | 0.962 | 0.807 | 6,270 | 9.1721 |
| 132 | 0 | 0 | 0.1 | 0.3 | 0.1 | 0.962 | 0.807 | 6,270 | 9.1721 |
| 133 | 0 | 0 | 0.1 | 0.3 | 0.2 | 0.962 | 0.807 | 6,270 | 9.1721 |
| 134 | 0 | 0 | 0.1 | 0.3 | 0.3 | 0.962 | 0.807 | 6,270 | 9.1721 |
| 135 | 0 | 0 | 0.1 | 0.3 | 0.4 | 0.961 | 0.808 | 6,270 | 9.1721 |
| 136 | 0 | 0 | 0.1 | 0.3 | 0.5 | 0.961 | 0.810 | 6,268 | 9.1720 |
| 137 | 0 | 0 | 0.1 | 0.3 | 0.6 | 0.959 | 0.813 | 6,266 | 9.1718 |
| 138 | 0 | 0 | 0.1 | 0.3 | 0.7 | 0.957 | 0.815 | 6,264 | 9.1716 |
| 139 | 0 | 0 | 0.1 | 0.3 | 0.8 | 0.954 | 0.818 | 6,262 | 9.1712 |
| 140 | 0 | 0 | 0.1 | 0.3 | 0.9 | 0.948 | 0.821 | 6,259 | 9.1706 |
| 141 | 0 | 0 | 0.1 | 0.4 | 0   | 0.962 | 0.807 | 6,270 | 9.1721 |
| 142 | 0 | 0 | 0.1 | 0.4 | 0.1 | 0.962 | 0.807 | 6,270 | 9.1721 |
| 143 | 0 | 0 | 0.1 | 0.4 | 0.2 | 0.962 | 0.807 | 6,270 | 9.1721 |
| 144 | 0 | 0 | 0.1 | 0.4 | 0.3 | 0.962 | 0.808 | 6,270 | 9.1721 |
| 145 | 0 | 0 | 0.1 | 0.4 | 0.4 | 0.961 | 0.808 | 6,270 | 9.1721 |
| 146 | 0 | 0 | 0.1 | 0.4 | 0.5 | 0.960 | 0.810 | 6,268 | 9.1719 |
| 147 | 0 | 0 | 0.1 | 0.4 | 0.6 | 0.958 | 0.813 | 6,266 | 9.1717 |
| 148 | 0 | 0 | 0.1 | 0.4 | 0.7 | 0.956 | 0.815 | 6,264 | 9.1715 |
| 149 | 0 | 0 | 0.1 | 0.4 | 0.8 | 0.953 | 0.818 | 6,262 | 9.1712 |
| 150 | 0 | 0 | 0.1 | 0.4 | 0.9 | 0.947 | 0.821 | 6,259 | 9.1705 |
| 151 | 0 | 0 | 0.1 | 0.5 | 0   | 0.962 | 0.808 | 6,270 | 9.1721 |
| 152 | 0 | 0 | 0.1 | 0.5 | 0.1 | 0.962 | 0.808 | 6,270 | 9.1721 |
| 153 | 0 | 0 | 0.1 | 0.5 | 0.2 | 0.962 | 0.808 | 6,270 | 9.1721 |
| 154 | 0 | 0 | 0.1 | 0.5 | 0.3 | 0.962 | 0.808 | 6,270 | 9.1721 |
| 155 | 0 | 0 | 0.1 | 0.5 | 0.4 | 0.961 | 0.808 | 6,270 | 9.1720 |
| 156 | 0 | 0 | 0.1 | 0.5 | 0.5 | 0.960 | 0.810 | 6,268 | 9.1719 |
| 157 | 0 | 0 | 0.1 | 0.5 | 0.6 | 0.958 | 0.813 | 6,266 | 9.1717 |
| 158 | 0 | 0 | 0.1 | 0.5 | 0.7 | 0.956 | 0.815 | 6,264 | 9.1715 |
| 159 | 0 | 0 | 0.1 | 0.5 | 0.8 | 0.952 | 0.818 | 6,262 | 9.1711 |
| 160 | 0 | 0 | 0.1 | 0.5 | 0.9 | 0.946 | 0.821 | 6,259 | 9.1704 |
| 161 | 0 | 0 | 0.1 | 0.6 | 0   | 0.961 | 0.808 | 6,270 | 9.1721 |
| 162 | 0 | 0 | 0.1 | 0.6 | 0.1 | 0.961 | 0.808 | 6,270 | 9.1721 |
| 163 | 0 | 0 | 0.1 | 0.6 | 0.2 | 0.961 | 0.808 | 6,270 | 9.1721 |

|     |   |   |     |     |     |       |       |       |        |
|-----|---|---|-----|-----|-----|-------|-------|-------|--------|
| 164 | 0 | 0 | 0.1 | 0.6 | 0.3 | 0.961 | 0.808 | 6,270 | 9.1721 |
| 165 | 0 | 0 | 0.1 | 0.6 | 0.4 | 0.961 | 0.808 | 6,269 | 9.1720 |
| 166 | 0 | 0 | 0.1 | 0.6 | 0.5 | 0.960 | 0.810 | 6,268 | 9.1719 |
| 167 | 0 | 0 | 0.1 | 0.6 | 0.6 | 0.958 | 0.813 | 6,266 | 9.1717 |
| 168 | 0 | 0 | 0.1 | 0.6 | 0.7 | 0.955 | 0.815 | 6,264 | 9.1714 |
| 169 | 0 | 0 | 0.1 | 0.6 | 0.8 | 0.952 | 0.818 | 6,262 | 9.1710 |
| 170 | 0 | 0 | 0.1 | 0.6 | 0.9 | 0.945 | 0.821 | 6,259 | 9.1703 |
| 171 | 0 | 0 | 0.1 | 0.7 | 0   | 0.961 | 0.808 | 6,270 | 9.1721 |
| 172 | 0 | 0 | 0.1 | 0.7 | 0.1 | 0.961 | 0.808 | 6,270 | 9.1721 |
| 173 | 0 | 0 | 0.1 | 0.7 | 0.2 | 0.961 | 0.808 | 6,270 | 9.1721 |
| 174 | 0 | 0 | 0.1 | 0.7 | 0.3 | 0.961 | 0.808 | 6,270 | 9.1721 |
| 175 | 0 | 0 | 0.1 | 0.7 | 0.4 | 0.961 | 0.808 | 6,269 | 9.1720 |
| 176 | 0 | 0 | 0.1 | 0.7 | 0.5 | 0.960 | 0.810 | 6,268 | 9.1719 |
| 177 | 0 | 0 | 0.1 | 0.7 | 0.6 | 0.957 | 0.813 | 6,265 | 9.1716 |
| 178 | 0 | 0 | 0.1 | 0.7 | 0.7 | 0.955 | 0.816 | 6,264 | 9.1714 |
| 179 | 0 | 0 | 0.1 | 0.7 | 0.8 | 0.951 | 0.818 | 6,262 | 9.1710 |
| 180 | 0 | 0 | 0.1 | 0.7 | 0.9 | 0.944 | 0.821 | 6,259 | 9.1702 |
| 181 | 0 | 0 | 0.1 | 0.8 | 0   | 0.961 | 0.808 | 6,270 | 9.1721 |
| 182 | 0 | 0 | 0.1 | 0.8 | 0.1 | 0.961 | 0.808 | 6,270 | 9.1721 |
| 183 | 0 | 0 | 0.1 | 0.8 | 0.2 | 0.961 | 0.808 | 6,270 | 9.1721 |
| 184 | 0 | 0 | 0.1 | 0.8 | 0.3 | 0.961 | 0.808 | 6,270 | 9.1720 |
| 185 | 0 | 0 | 0.1 | 0.8 | 0.4 | 0.960 | 0.808 | 6,269 | 9.1720 |
| 186 | 0 | 0 | 0.1 | 0.8 | 0.5 | 0.959 | 0.810 | 6,268 | 9.1718 |
| 187 | 0 | 0 | 0.1 | 0.8 | 0.6 | 0.957 | 0.813 | 6,265 | 9.1716 |
| 188 | 0 | 0 | 0.1 | 0.8 | 0.7 | 0.954 | 0.816 | 6,263 | 9.1713 |
| 189 | 0 | 0 | 0.1 | 0.8 | 0.8 | 0.950 | 0.818 | 6,261 | 9.1709 |
| 190 | 0 | 0 | 0.1 | 0.8 | 0.9 | 0.943 | 0.821 | 6,259 | 9.1701 |
| 191 | 0 | 0 | 0.1 | 0.9 | 0   | 0.961 | 0.808 | 6,270 | 9.1721 |
| 192 | 0 | 0 | 0.1 | 0.9 | 0.1 | 0.961 | 0.808 | 6,270 | 9.1721 |
| 193 | 0 | 0 | 0.1 | 0.9 | 0.2 | 0.961 | 0.808 | 6,270 | 9.1720 |
| 194 | 0 | 0 | 0.1 | 0.9 | 0.3 | 0.961 | 0.808 | 6,270 | 9.1720 |
| 195 | 0 | 0 | 0.1 | 0.9 | 0.4 | 0.960 | 0.808 | 6,269 | 9.1719 |
| 196 | 0 | 0 | 0.1 | 0.9 | 0.5 | 0.959 | 0.811 | 6,268 | 9.1718 |
| 197 | 0 | 0 | 0.1 | 0.9 | 0.6 | 0.956 | 0.813 | 6,265 | 9.1715 |
| 198 | 0 | 0 | 0.1 | 0.9 | 0.7 | 0.953 | 0.816 | 6,263 | 9.1712 |
| 199 | 0 | 0 | 0.1 | 0.9 | 0.8 | 0.949 | 0.818 | 6,261 | 9.1708 |
| 200 | 0 | 0 | 0.1 | 0.9 | 0.9 | 0.942 | 0.821 | 6,259 | 9.1700 |
| 201 | 0 | 0 | 0.2 | 0   | 0   | 0.962 | 0.807 | 6,270 | 9.1721 |
| 202 | 0 | 0 | 0.2 | 0   | 0.1 | 0.962 | 0.807 | 6,270 | 9.1721 |
| 203 | 0 | 0 | 0.2 | 0   | 0.2 | 0.962 | 0.807 | 6,270 | 9.1721 |
| 204 | 0 | 0 | 0.2 | 0   | 0.3 | 0.962 | 0.807 | 6,270 | 9.1721 |
| 205 | 0 | 0 | 0.2 | 0   | 0.4 | 0.961 | 0.808 | 6,270 | 9.1721 |

|     |   |   |     |     |     |       |       |       |        |
|-----|---|---|-----|-----|-----|-------|-------|-------|--------|
| 206 | 0 | 0 | 0.2 | 0   | 0.5 | 0.961 | 0.810 | 6,268 | 9.1720 |
| 207 | 0 | 0 | 0.2 | 0   | 0.6 | 0.959 | 0.813 | 6,266 | 9.1718 |
| 208 | 0 | 0 | 0.2 | 0   | 0.7 | 0.957 | 0.816 | 6,264 | 9.1716 |
| 209 | 0 | 0 | 0.2 | 0   | 0.8 | 0.954 | 0.818 | 6,261 | 9.1713 |
| 210 | 0 | 0 | 0.2 | 0   | 0.9 | 0.950 | 0.822 | 6,258 | 9.1708 |
| 211 | 0 | 0 | 0.2 | 0.1 | 0   | 0.962 | 0.807 | 6,270 | 9.1721 |
| 212 | 0 | 0 | 0.2 | 0.1 | 0.1 | 0.962 | 0.807 | 6,270 | 9.1721 |
| 213 | 0 | 0 | 0.2 | 0.1 | 0.2 | 0.962 | 0.807 | 6,270 | 9.1721 |
| 214 | 0 | 0 | 0.2 | 0.1 | 0.3 | 0.962 | 0.807 | 6,270 | 9.1721 |
| 215 | 0 | 0 | 0.2 | 0.1 | 0.4 | 0.961 | 0.808 | 6,270 | 9.1721 |
| 216 | 0 | 0 | 0.2 | 0.1 | 0.5 | 0.961 | 0.810 | 6,268 | 9.1720 |
| 217 | 0 | 0 | 0.2 | 0.1 | 0.6 | 0.959 | 0.813 | 6,266 | 9.1718 |
| 218 | 0 | 0 | 0.2 | 0.1 | 0.7 | 0.957 | 0.816 | 6,263 | 9.1716 |
| 219 | 0 | 0 | 0.2 | 0.1 | 0.8 | 0.953 | 0.819 | 6,261 | 9.1712 |
| 220 | 0 | 0 | 0.2 | 0.1 | 0.9 | 0.946 | 0.822 | 6,258 | 9.1704 |
| 221 | 0 | 0 | 0.2 | 0.2 | 0   | 0.962 | 0.807 | 6,270 | 9.1721 |
| 222 | 0 | 0 | 0.2 | 0.2 | 0.1 | 0.962 | 0.807 | 6,270 | 9.1721 |
| 223 | 0 | 0 | 0.2 | 0.2 | 0.2 | 0.962 | 0.807 | 6,270 | 9.1721 |
| 224 | 0 | 0 | 0.2 | 0.2 | 0.3 | 0.962 | 0.807 | 6,270 | 9.1721 |
| 225 | 0 | 0 | 0.2 | 0.2 | 0.4 | 0.961 | 0.808 | 6,270 | 9.1721 |
| 226 | 0 | 0 | 0.2 | 0.2 | 0.5 | 0.961 | 0.810 | 6,268 | 9.1720 |
| 227 | 0 | 0 | 0.2 | 0.2 | 0.6 | 0.959 | 0.813 | 6,266 | 9.1718 |
| 228 | 0 | 0 | 0.2 | 0.2 | 0.7 | 0.957 | 0.816 | 6,263 | 9.1715 |
| 229 | 0 | 0 | 0.2 | 0.2 | 0.8 | 0.952 | 0.819 | 6,261 | 9.1710 |
| 230 | 0 | 0 | 0.2 | 0.2 | 0.9 | 0.943 | 0.823 | 6,258 | 9.1701 |
| 231 | 0 | 0 | 0.2 | 0.3 | 0   | 0.962 | 0.807 | 6,270 | 9.1721 |
| 232 | 0 | 0 | 0.2 | 0.3 | 0.1 | 0.962 | 0.807 | 6,270 | 9.1721 |
| 233 | 0 | 0 | 0.2 | 0.3 | 0.2 | 0.962 | 0.807 | 6,270 | 9.1721 |
| 234 | 0 | 0 | 0.2 | 0.3 | 0.3 | 0.962 | 0.807 | 6,270 | 9.1721 |
| 235 | 0 | 0 | 0.2 | 0.3 | 0.4 | 0.961 | 0.808 | 6,270 | 9.1721 |
| 236 | 0 | 0 | 0.2 | 0.3 | 0.5 | 0.960 | 0.810 | 6,268 | 9.1720 |
| 237 | 0 | 0 | 0.2 | 0.3 | 0.6 | 0.958 | 0.813 | 6,266 | 9.1717 |
| 238 | 0 | 0 | 0.2 | 0.3 | 0.7 | 0.956 | 0.816 | 6,263 | 9.1714 |
| 239 | 0 | 0 | 0.2 | 0.3 | 0.8 | 0.950 | 0.819 | 6,261 | 9.1708 |
| 240 | 0 | 0 | 0.2 | 0.3 | 0.9 | 0.941 | 0.823 | 6,257 | 9.1699 |
| 241 | 0 | 0 | 0.2 | 0.4 | 0   | 0.962 | 0.807 | 6,270 | 9.1721 |
| 242 | 0 | 0 | 0.2 | 0.4 | 0.1 | 0.962 | 0.807 | 6,270 | 9.1721 |
| 243 | 0 | 0 | 0.2 | 0.4 | 0.2 | 0.962 | 0.807 | 6,270 | 9.1721 |
| 244 | 0 | 0 | 0.2 | 0.4 | 0.3 | 0.962 | 0.808 | 6,270 | 9.1721 |
| 245 | 0 | 0 | 0.2 | 0.4 | 0.4 | 0.961 | 0.808 | 6,270 | 9.1721 |
| 246 | 0 | 0 | 0.2 | 0.4 | 0.5 | 0.960 | 0.810 | 6,268 | 9.1719 |
| 247 | 0 | 0 | 0.2 | 0.4 | 0.6 | 0.958 | 0.813 | 6,266 | 9.1717 |

|     |   |   |     |     |     |       |       |       |        |
|-----|---|---|-----|-----|-----|-------|-------|-------|--------|
| 248 | 0 | 0 | 0.2 | 0.4 | 0.7 | 0.955 | 0.816 | 6,263 | 9.1714 |
| 249 | 0 | 0 | 0.2 | 0.4 | 0.8 | 0.949 | 0.819 | 6,261 | 9.1707 |
| 250 | 0 | 0 | 0.2 | 0.4 | 0.9 | 0.939 | 0.823 | 6,257 | 9.1696 |
| 251 | 0 | 0 | 0.2 | 0.5 | 0   | 0.962 | 0.808 | 6,270 | 9.1721 |
| 252 | 0 | 0 | 0.2 | 0.5 | 0.1 | 0.962 | 0.808 | 6,270 | 9.1721 |
| 253 | 0 | 0 | 0.2 | 0.5 | 0.2 | 0.962 | 0.808 | 6,270 | 9.1721 |
| 254 | 0 | 0 | 0.2 | 0.5 | 0.3 | 0.962 | 0.808 | 6,270 | 9.1721 |
| 255 | 0 | 0 | 0.2 | 0.5 | 0.4 | 0.961 | 0.808 | 6,269 | 9.1720 |
| 256 | 0 | 0 | 0.2 | 0.5 | 0.5 | 0.960 | 0.810 | 6,268 | 9.1719 |
| 257 | 0 | 0 | 0.2 | 0.5 | 0.6 | 0.957 | 0.813 | 6,265 | 9.1716 |
| 258 | 0 | 0 | 0.2 | 0.5 | 0.7 | 0.954 | 0.816 | 6,263 | 9.1713 |
| 259 | 0 | 0 | 0.2 | 0.5 | 0.8 | 0.948 | 0.819 | 6,260 | 9.1706 |
| 260 | 0 | 0 | 0.2 | 0.5 | 0.9 | 0.937 | 0.823 | 6,257 | 9.1694 |
| 261 | 0 | 0 | 0.2 | 0.6 | 0   | 0.961 | 0.808 | 6,270 | 9.1721 |
| 262 | 0 | 0 | 0.2 | 0.6 | 0.1 | 0.961 | 0.808 | 6,270 | 9.1721 |
| 263 | 0 | 0 | 0.2 | 0.6 | 0.2 | 0.961 | 0.808 | 6,270 | 9.1721 |
| 264 | 0 | 0 | 0.2 | 0.6 | 0.3 | 0.961 | 0.808 | 6,270 | 9.1721 |
| 265 | 0 | 0 | 0.2 | 0.6 | 0.4 | 0.960 | 0.808 | 6,269 | 9.1720 |
| 266 | 0 | 0 | 0.2 | 0.6 | 0.5 | 0.959 | 0.810 | 6,268 | 9.1718 |
| 267 | 0 | 0 | 0.2 | 0.6 | 0.6 | 0.956 | 0.813 | 6,265 | 9.1715 |
| 268 | 0 | 0 | 0.2 | 0.6 | 0.7 | 0.953 | 0.816 | 6,263 | 9.1711 |
| 269 | 0 | 0 | 0.2 | 0.6 | 0.8 | 0.946 | 0.819 | 6,260 | 9.1704 |
| 270 | 0 | 0 | 0.2 | 0.6 | 0.9 | 0.935 | 0.823 | 6,257 | 9.1692 |
| 271 | 0 | 0 | 0.2 | 0.7 | 0   | 0.961 | 0.808 | 6,270 | 9.1721 |
| 272 | 0 | 0 | 0.2 | 0.7 | 0.1 | 0.961 | 0.808 | 6,270 | 9.1721 |
| 273 | 0 | 0 | 0.2 | 0.7 | 0.2 | 0.961 | 0.808 | 6,270 | 9.1720 |
| 274 | 0 | 0 | 0.2 | 0.7 | 0.3 | 0.961 | 0.808 | 6,270 | 9.1720 |
| 275 | 0 | 0 | 0.2 | 0.7 | 0.4 | 0.960 | 0.808 | 6,269 | 9.1719 |
| 276 | 0 | 0 | 0.2 | 0.7 | 0.5 | 0.958 | 0.811 | 6,268 | 9.1717 |
| 277 | 0 | 0 | 0.2 | 0.7 | 0.6 | 0.955 | 0.814 | 6,265 | 9.1714 |
| 278 | 0 | 0 | 0.2 | 0.7 | 0.7 | 0.951 | 0.816 | 6,263 | 9.1710 |
| 279 | 0 | 0 | 0.2 | 0.7 | 0.8 | 0.944 | 0.820 | 6,260 | 9.1702 |
| 280 | 0 | 0 | 0.2 | 0.7 | 0.9 | 0.933 | 0.824 | 6,257 | 9.1689 |
| 281 | 0 | 0 | 0.2 | 0.8 | 0   | 0.961 | 0.808 | 6,270 | 9.1721 |
| 282 | 0 | 0 | 0.2 | 0.8 | 0.1 | 0.961 | 0.808 | 6,270 | 9.1721 |
| 283 | 0 | 0 | 0.2 | 0.8 | 0.2 | 0.961 | 0.808 | 6,270 | 9.1720 |
| 284 | 0 | 0 | 0.2 | 0.8 | 0.3 | 0.960 | 0.808 | 6,270 | 9.1719 |
| 285 | 0 | 0 | 0.2 | 0.8 | 0.4 | 0.959 | 0.809 | 6,269 | 9.1718 |
| 286 | 0 | 0 | 0.2 | 0.8 | 0.5 | 0.957 | 0.811 | 6,267 | 9.1716 |
| 287 | 0 | 0 | 0.2 | 0.8 | 0.6 | 0.954 | 0.814 | 6,265 | 9.1713 |
| 288 | 0 | 0 | 0.2 | 0.8 | 0.7 | 0.950 | 0.816 | 6,263 | 9.1708 |
| 289 | 0 | 0 | 0.2 | 0.8 | 0.8 | 0.943 | 0.820 | 6,260 | 9.1700 |



|     |   |   |     |     |     |       |       |       |        |
|-----|---|---|-----|-----|-----|-------|-------|-------|--------|
| 290 | 0 | 0 | 0.2 | 0.8 | 0.9 | 0.931 | 0.824 | 6,257 | 9.1687 |
| 291 | 0 | 0 | 0.2 | 0.9 | 0   | 0.961 | 0.808 | 6,270 | 9.1721 |
| 292 | 0 | 0 | 0.2 | 0.9 | 0.1 | 0.961 | 0.808 | 6,270 | 9.1720 |
| 293 | 0 | 0 | 0.2 | 0.9 | 0.2 | 0.960 | 0.808 | 6,270 | 9.1719 |
| 294 | 0 | 0 | 0.2 | 0.9 | 0.3 | 0.959 | 0.808 | 6,270 | 9.1718 |
| 295 | 0 | 0 | 0.2 | 0.9 | 0.4 | 0.958 | 0.809 | 6,269 | 9.1717 |
| 296 | 0 | 0 | 0.2 | 0.9 | 0.5 | 0.956 | 0.811 | 6,267 | 9.1714 |
| 297 | 0 | 0 | 0.2 | 0.9 | 0.6 | 0.952 | 0.814 | 6,265 | 9.1711 |
| 298 | 0 | 0 | 0.2 | 0.9 | 0.7 | 0.948 | 0.817 | 6,263 | 9.1706 |
| 299 | 0 | 0 | 0.2 | 0.9 | 0.8 | 0.941 | 0.820 | 6,260 | 9.1698 |
| 300 | 0 | 0 | 0.2 | 0.9 | 0.9 | 0.928 | 0.824 | 6,256 | 9.1684 |
| 301 | 0 | 0 | 0.3 | 0   | 0   | 0.962 | 0.807 | 6,270 | 9.1721 |
| 302 | 0 | 0 | 0.3 | 0   | 0.1 | 0.962 | 0.807 | 6,270 | 9.1721 |
| 303 | 0 | 0 | 0.3 | 0   | 0.2 | 0.962 | 0.807 | 6,270 | 9.1721 |
| 304 | 0 | 0 | 0.3 | 0   | 0.3 | 0.962 | 0.808 | 6,270 | 9.1721 |
| 305 | 0 | 0 | 0.3 | 0   | 0.4 | 0.961 | 0.808 | 6,269 | 9.1720 |
| 306 | 0 | 0 | 0.3 | 0   | 0.5 | 0.960 | 0.811 | 6,267 | 9.1719 |
| 307 | 0 | 0 | 0.3 | 0   | 0.6 | 0.958 | 0.814 | 6,265 | 9.1717 |
| 308 | 0 | 0 | 0.3 | 0   | 0.7 | 0.956 | 0.817 | 6,262 | 9.1715 |
| 309 | 0 | 0 | 0.3 | 0   | 0.8 | 0.953 | 0.820 | 6,260 | 9.1711 |
| 310 | 0 | 0 | 0.3 | 0   | 0.9 | 0.948 | 0.823 | 6,257 | 9.1706 |
| 311 | 0 | 0 | 0.3 | 0.1 | 0   | 0.962 | 0.807 | 6,270 | 9.1721 |
| 312 | 0 | 0 | 0.3 | 0.1 | 0.1 | 0.962 | 0.807 | 6,270 | 9.1721 |
| 313 | 0 | 0 | 0.3 | 0.1 | 0.2 | 0.962 | 0.807 | 6,270 | 9.1721 |
| 314 | 0 | 0 | 0.3 | 0.1 | 0.3 | 0.962 | 0.808 | 6,270 | 9.1721 |
| 315 | 0 | 0 | 0.3 | 0.1 | 0.4 | 0.961 | 0.808 | 6,269 | 9.1720 |
| 316 | 0 | 0 | 0.3 | 0.1 | 0.5 | 0.960 | 0.811 | 6,267 | 9.1719 |
| 317 | 0 | 0 | 0.3 | 0.1 | 0.6 | 0.958 | 0.814 | 6,265 | 9.1717 |
| 318 | 0 | 0 | 0.3 | 0.1 | 0.7 | 0.955 | 0.817 | 6,262 | 9.1714 |
| 319 | 0 | 0 | 0.3 | 0.1 | 0.8 | 0.951 | 0.821 | 6,259 | 9.1709 |
| 320 | 0 | 0 | 0.3 | 0.1 | 0.9 | 0.943 | 0.825 | 6,256 | 9.1701 |
| 321 | 0 | 0 | 0.3 | 0.2 | 0   | 0.962 | 0.807 | 6,270 | 9.1721 |
| 322 | 0 | 0 | 0.3 | 0.2 | 0.1 | 0.962 | 0.807 | 6,270 | 9.1721 |
| 323 | 0 | 0 | 0.3 | 0.2 | 0.2 | 0.962 | 0.807 | 6,270 | 9.1721 |
| 324 | 0 | 0 | 0.3 | 0.2 | 0.3 | 0.962 | 0.808 | 6,270 | 9.1721 |
| 325 | 0 | 0 | 0.3 | 0.2 | 0.4 | 0.961 | 0.809 | 6,269 | 9.1720 |
| 326 | 0 | 0 | 0.3 | 0.2 | 0.5 | 0.960 | 0.811 | 6,267 | 9.1719 |
| 327 | 0 | 0 | 0.3 | 0.2 | 0.6 | 0.957 | 0.814 | 6,265 | 9.1716 |
| 328 | 0 | 0 | 0.3 | 0.2 | 0.7 | 0.954 | 0.818 | 6,262 | 9.1713 |
| 329 | 0 | 0 | 0.3 | 0.2 | 0.8 | 0.948 | 0.821 | 6,259 | 9.1706 |
| 330 | 0 | 0 | 0.3 | 0.2 | 0.9 | 0.939 | 0.825 | 6,256 | 9.1696 |
| 331 | 0 | 0 | 0.3 | 0.3 | 0   | 0.962 | 0.808 | 6,270 | 9.1721 |

|     |   |   |     |     |     |       |       |       |        |
|-----|---|---|-----|-----|-----|-------|-------|-------|--------|
| 332 | 0 | 0 | 0.3 | 0.3 | 0.1 | 0.962 | 0.808 | 6,270 | 9.1721 |
| 333 | 0 | 0 | 0.3 | 0.3 | 0.2 | 0.962 | 0.808 | 6,270 | 9.1721 |
| 334 | 0 | 0 | 0.3 | 0.3 | 0.3 | 0.962 | 0.808 | 6,270 | 9.1721 |
| 335 | 0 | 0 | 0.3 | 0.3 | 0.4 | 0.961 | 0.809 | 6,269 | 9.1720 |
| 336 | 0 | 0 | 0.3 | 0.3 | 0.5 | 0.960 | 0.811 | 6,267 | 9.1719 |
| 337 | 0 | 0 | 0.3 | 0.3 | 0.6 | 0.957 | 0.814 | 6,265 | 9.1716 |
| 338 | 0 | 0 | 0.3 | 0.3 | 0.7 | 0.953 | 0.818 | 6,262 | 9.1711 |
| 339 | 0 | 0 | 0.3 | 0.3 | 0.8 | 0.946 | 0.821 | 6,259 | 9.1704 |
| 340 | 0 | 0 | 0.3 | 0.3 | 0.9 | 0.935 | 0.825 | 6,255 | 9.1692 |
| 341 | 0 | 0 | 0.3 | 0.4 | 0   | 0.962 | 0.808 | 6,270 | 9.1721 |
| 342 | 0 | 0 | 0.3 | 0.4 | 0.1 | 0.962 | 0.808 | 6,270 | 9.1721 |
| 343 | 0 | 0 | 0.3 | 0.4 | 0.2 | 0.962 | 0.808 | 6,270 | 9.1721 |
| 344 | 0 | 0 | 0.3 | 0.4 | 0.3 | 0.962 | 0.808 | 6,270 | 9.1721 |
| 345 | 0 | 0 | 0.3 | 0.4 | 0.4 | 0.961 | 0.809 | 6,269 | 9.1720 |
| 346 | 0 | 0 | 0.3 | 0.4 | 0.5 | 0.959 | 0.811 | 6,267 | 9.1718 |
| 347 | 0 | 0 | 0.3 | 0.4 | 0.6 | 0.956 | 0.814 | 6,264 | 9.1715 |
| 348 | 0 | 0 | 0.3 | 0.4 | 0.7 | 0.951 | 0.818 | 6,262 | 9.1710 |
| 349 | 0 | 0 | 0.3 | 0.4 | 0.8 | 0.944 | 0.822 | 6,259 | 9.1701 |
| 350 | 0 | 0 | 0.3 | 0.4 | 0.9 | 0.932 | 0.826 | 6,255 | 9.1689 |
| 351 | 0 | 0 | 0.3 | 0.5 | 0   | 0.962 | 0.808 | 6,270 | 9.1721 |
| 352 | 0 | 0 | 0.3 | 0.5 | 0.1 | 0.962 | 0.808 | 6,270 | 9.1721 |
| 353 | 0 | 0 | 0.3 | 0.5 | 0.2 | 0.961 | 0.808 | 6,270 | 9.1721 |
| 354 | 0 | 0 | 0.3 | 0.5 | 0.3 | 0.961 | 0.808 | 6,270 | 9.1720 |
| 355 | 0 | 0 | 0.3 | 0.5 | 0.4 | 0.960 | 0.809 | 6,269 | 9.1719 |
| 356 | 0 | 0 | 0.3 | 0.5 | 0.5 | 0.958 | 0.811 | 6,267 | 9.1717 |
| 357 | 0 | 0 | 0.3 | 0.5 | 0.6 | 0.955 | 0.815 | 6,264 | 9.1713 |
| 358 | 0 | 0 | 0.3 | 0.5 | 0.7 | 0.950 | 0.818 | 6,261 | 9.1708 |
| 359 | 0 | 0 | 0.3 | 0.5 | 0.8 | 0.941 | 0.822 | 6,258 | 9.1699 |
| 360 | 0 | 0 | 0.3 | 0.5 | 0.9 | 0.929 | 0.826 | 6,255 | 9.1685 |
| 361 | 0 | 0 | 0.3 | 0.6 | 0   | 0.961 | 0.808 | 6,270 | 9.1721 |
| 362 | 0 | 0 | 0.3 | 0.6 | 0.1 | 0.961 | 0.808 | 6,270 | 9.1721 |
| 363 | 0 | 0 | 0.3 | 0.6 | 0.2 | 0.961 | 0.808 | 6,270 | 9.1720 |
| 364 | 0 | 0 | 0.3 | 0.6 | 0.3 | 0.961 | 0.808 | 6,270 | 9.1720 |
| 365 | 0 | 0 | 0.3 | 0.6 | 0.4 | 0.959 | 0.809 | 6,269 | 9.1718 |
| 366 | 0 | 0 | 0.3 | 0.6 | 0.5 | 0.957 | 0.811 | 6,267 | 9.1716 |
| 367 | 0 | 0 | 0.3 | 0.6 | 0.6 | 0.953 | 0.815 | 6,264 | 9.1711 |
| 368 | 0 | 0 | 0.3 | 0.6 | 0.7 | 0.947 | 0.818 | 6,261 | 9.1705 |
| 369 | 0 | 0 | 0.3 | 0.6 | 0.8 | 0.938 | 0.822 | 6,258 | 9.1695 |
| 370 | 0 | 0 | 0.3 | 0.6 | 0.9 | 0.925 | 0.826 | 6,254 | 9.1680 |
| 371 | 0 | 0 | 0.3 | 0.7 | 0   | 0.961 | 0.808 | 6,270 | 9.1721 |
| 372 | 0 | 0 | 0.3 | 0.7 | 0.1 | 0.961 | 0.808 | 6,270 | 9.1720 |
| 373 | 0 | 0 | 0.3 | 0.7 | 0.2 | 0.961 | 0.808 | 6,270 | 9.1720 |

|     |   |   |     |     |     |       |       |       |        |
|-----|---|---|-----|-----|-----|-------|-------|-------|--------|
| 374 | 0 | 0 | 0.3 | 0.7 | 0.3 | 0.960 | 0.808 | 6,270 | 9.1719 |
| 375 | 0 | 0 | 0.3 | 0.7 | 0.4 | 0.958 | 0.809 | 6,269 | 9.1717 |
| 376 | 0 | 0 | 0.3 | 0.7 | 0.5 | 0.955 | 0.812 | 6,267 | 9.1714 |
| 377 | 0 | 0 | 0.3 | 0.7 | 0.6 | 0.951 | 0.815 | 6,264 | 9.1709 |
| 378 | 0 | 0 | 0.3 | 0.7 | 0.7 | 0.945 | 0.819 | 6,261 | 9.1703 |
| 379 | 0 | 0 | 0.3 | 0.7 | 0.8 | 0.936 | 0.822 | 6,258 | 9.1692 |
| 380 | 0 | 0 | 0.3 | 0.7 | 0.9 | 0.921 | 0.827 | 6,254 | 9.1676 |
| 381 | 0 | 0 | 0.3 | 0.8 | 0   | 0.961 | 0.808 | 6,270 | 9.1721 |
| 382 | 0 | 0 | 0.3 | 0.8 | 0.1 | 0.961 | 0.808 | 6,270 | 9.1720 |
| 383 | 0 | 0 | 0.3 | 0.8 | 0.2 | 0.960 | 0.808 | 6,270 | 9.1719 |
| 384 | 0 | 0 | 0.3 | 0.8 | 0.3 | 0.958 | 0.808 | 6,269 | 9.1717 |
| 385 | 0 | 0 | 0.3 | 0.8 | 0.4 | 0.956 | 0.809 | 6,269 | 9.1715 |
| 386 | 0 | 0 | 0.3 | 0.8 | 0.5 | 0.954 | 0.812 | 6,266 | 9.1712 |
| 387 | 0 | 0 | 0.3 | 0.8 | 0.6 | 0.949 | 0.815 | 6,264 | 9.1707 |
| 388 | 0 | 0 | 0.3 | 0.8 | 0.7 | 0.942 | 0.819 | 6,261 | 9.1700 |
| 389 | 0 | 0 | 0.3 | 0.8 | 0.8 | 0.933 | 0.823 | 6,257 | 9.1689 |
| 390 | 0 | 0 | 0.3 | 0.8 | 0.9 | 0.918 | 0.827 | 6,254 | 9.1672 |
| 391 | 0 | 0 | 0.3 | 0.9 | 0   | 0.961 | 0.808 | 6,270 | 9.1720 |
| 392 | 0 | 0 | 0.3 | 0.9 | 0.1 | 0.961 | 0.808 | 6,270 | 9.1720 |
| 393 | 0 | 0 | 0.3 | 0.9 | 0.2 | 0.959 | 0.808 | 6,270 | 9.1718 |
| 394 | 0 | 0 | 0.3 | 0.9 | 0.3 | 0.957 | 0.808 | 6,269 | 9.1716 |
| 395 | 0 | 0 | 0.3 | 0.9 | 0.4 | 0.955 | 0.809 | 6,268 | 9.1714 |
| 396 | 0 | 0 | 0.3 | 0.9 | 0.5 | 0.952 | 0.812 | 6,266 | 9.1710 |
| 397 | 0 | 0 | 0.3 | 0.9 | 0.6 | 0.947 | 0.816 | 6,263 | 9.1705 |
| 398 | 0 | 0 | 0.3 | 0.9 | 0.7 | 0.940 | 0.819 | 6,260 | 9.1697 |
| 399 | 0 | 0 | 0.3 | 0.9 | 0.8 | 0.930 | 0.823 | 6,257 | 9.1686 |
| 400 | 0 | 0 | 0.3 | 0.9 | 0.9 | 0.914 | 0.827 | 6,253 | 9.1668 |
| 401 | 0 | 0 | 0.4 | 0   | 0   | 0.961 | 0.812 | 6,267 | 9.1720 |
| 402 | 0 | 0 | 0.4 | 0   | 0.1 | 0.961 | 0.812 | 6,267 | 9.1720 |
| 403 | 0 | 0 | 0.4 | 0   | 0.2 | 0.961 | 0.812 | 6,267 | 9.1720 |
| 404 | 0 | 0 | 0.4 | 0   | 0.3 | 0.960 | 0.812 | 6,266 | 9.1720 |
| 405 | 0 | 0 | 0.4 | 0   | 0.4 | 0.960 | 0.813 | 6,265 | 9.1719 |
| 406 | 0 | 0 | 0.4 | 0   | 0.5 | 0.958 | 0.816 | 6,263 | 9.1717 |
| 407 | 0 | 0 | 0.4 | 0   | 0.6 | 0.956 | 0.820 | 6,260 | 9.1714 |
| 408 | 0 | 0 | 0.4 | 0   | 0.7 | 0.953 | 0.823 | 6,258 | 9.1712 |
| 409 | 0 | 0 | 0.4 | 0   | 0.8 | 0.950 | 0.826 | 6,255 | 9.1708 |
| 410 | 0 | 0 | 0.4 | 0   | 0.9 | 0.945 | 0.829 | 6,252 | 9.1703 |
| 411 | 0 | 0 | 0.4 | 0.1 | 0   | 0.961 | 0.812 | 6,267 | 9.1720 |
| 412 | 0 | 0 | 0.4 | 0.1 | 0.1 | 0.961 | 0.812 | 6,267 | 9.1720 |
| 413 | 0 | 0 | 0.4 | 0.1 | 0.2 | 0.961 | 0.812 | 6,267 | 9.1720 |
| 414 | 0 | 0 | 0.4 | 0.1 | 0.3 | 0.960 | 0.812 | 6,266 | 9.1720 |
| 415 | 0 | 0 | 0.4 | 0.1 | 0.4 | 0.960 | 0.813 | 6,265 | 9.1719 |

|     |   |   |     |     |     |       |       |       |        |
|-----|---|---|-----|-----|-----|-------|-------|-------|--------|
| 416 | 0 | 0 | 0.4 | 0.1 | 0.5 | 0.958 | 0.816 | 6,263 | 9.1717 |
| 417 | 0 | 0 | 0.4 | 0.1 | 0.6 | 0.955 | 0.820 | 6,260 | 9.1714 |
| 418 | 0 | 0 | 0.4 | 0.1 | 0.7 | 0.952 | 0.823 | 6,257 | 9.1710 |
| 419 | 0 | 0 | 0.4 | 0.1 | 0.8 | 0.947 | 0.827 | 6,254 | 9.1705 |
| 420 | 0 | 0 | 0.4 | 0.1 | 0.9 | 0.939 | 0.831 | 6,251 | 9.1696 |
| 421 | 0 | 0 | 0.4 | 0.2 | 0   | 0.961 | 0.812 | 6,267 | 9.1720 |
| 422 | 0 | 0 | 0.4 | 0.2 | 0.1 | 0.961 | 0.812 | 6,267 | 9.1720 |
| 423 | 0 | 0 | 0.4 | 0.2 | 0.2 | 0.961 | 0.812 | 6,267 | 9.1720 |
| 424 | 0 | 0 | 0.4 | 0.2 | 0.3 | 0.960 | 0.812 | 6,266 | 9.1720 |
| 425 | 0 | 0 | 0.4 | 0.2 | 0.4 | 0.960 | 0.813 | 6,265 | 9.1719 |
| 426 | 0 | 0 | 0.4 | 0.2 | 0.5 | 0.958 | 0.816 | 6,263 | 9.1717 |
| 427 | 0 | 0 | 0.4 | 0.2 | 0.6 | 0.954 | 0.820 | 6,260 | 9.1713 |
| 428 | 0 | 0 | 0.4 | 0.2 | 0.7 | 0.950 | 0.824 | 6,257 | 9.1708 |
| 429 | 0 | 0 | 0.4 | 0.2 | 0.8 | 0.943 | 0.828 | 6,254 | 9.1701 |
| 430 | 0 | 0 | 0.4 | 0.2 | 0.9 | 0.932 | 0.832 | 6,250 | 9.1689 |
| 431 | 0 | 0 | 0.4 | 0.3 | 0   | 0.961 | 0.812 | 6,267 | 9.1720 |
| 432 | 0 | 0 | 0.4 | 0.3 | 0.1 | 0.961 | 0.812 | 6,267 | 9.1720 |
| 433 | 0 | 0 | 0.4 | 0.3 | 0.2 | 0.961 | 0.812 | 6,267 | 9.1720 |
| 434 | 0 | 0 | 0.4 | 0.3 | 0.3 | 0.960 | 0.812 | 6,266 | 9.1719 |
| 435 | 0 | 0 | 0.4 | 0.3 | 0.4 | 0.959 | 0.813 | 6,265 | 9.1718 |
| 436 | 0 | 0 | 0.4 | 0.3 | 0.5 | 0.957 | 0.817 | 6,263 | 9.1716 |
| 437 | 0 | 0 | 0.4 | 0.3 | 0.6 | 0.953 | 0.821 | 6,259 | 9.1711 |
| 438 | 0 | 0 | 0.4 | 0.3 | 0.7 | 0.947 | 0.824 | 6,256 | 9.1705 |
| 439 | 0 | 0 | 0.4 | 0.3 | 0.8 | 0.939 | 0.828 | 6,253 | 9.1696 |
| 440 | 0 | 0 | 0.4 | 0.3 | 0.9 | 0.927 | 0.832 | 6,249 | 9.1683 |
| 441 | 0 | 0 | 0.4 | 0.4 | 0   | 0.961 | 0.812 | 6,267 | 9.1720 |
| 442 | 0 | 0 | 0.4 | 0.4 | 0.1 | 0.961 | 0.812 | 6,267 | 9.1720 |
| 443 | 0 | 0 | 0.4 | 0.4 | 0.2 | 0.960 | 0.812 | 6,267 | 9.1720 |
| 444 | 0 | 0 | 0.4 | 0.4 | 0.3 | 0.960 | 0.812 | 6,266 | 9.1719 |
| 445 | 0 | 0 | 0.4 | 0.4 | 0.4 | 0.958 | 0.814 | 6,265 | 9.1717 |
| 446 | 0 | 0 | 0.4 | 0.4 | 0.5 | 0.956 | 0.817 | 6,263 | 9.1714 |
| 447 | 0 | 0 | 0.4 | 0.4 | 0.6 | 0.951 | 0.821 | 6,259 | 9.1709 |
| 448 | 0 | 0 | 0.4 | 0.4 | 0.7 | 0.945 | 0.825 | 6,256 | 9.1703 |
| 449 | 0 | 0 | 0.4 | 0.4 | 0.8 | 0.936 | 0.829 | 6,253 | 9.1693 |
| 450 | 0 | 0 | 0.4 | 0.4 | 0.9 | 0.922 | 0.833 | 6,249 | 9.1677 |
| 451 | 0 | 0 | 0.4 | 0.5 | 0   | 0.960 | 0.812 | 6,267 | 9.1720 |
| 452 | 0 | 0 | 0.4 | 0.5 | 0.1 | 0.960 | 0.812 | 6,267 | 9.1720 |
| 453 | 0 | 0 | 0.4 | 0.5 | 0.2 | 0.960 | 0.812 | 6,267 | 9.1719 |
| 454 | 0 | 0 | 0.4 | 0.5 | 0.3 | 0.959 | 0.812 | 6,266 | 9.1718 |
| 455 | 0 | 0 | 0.4 | 0.5 | 0.4 | 0.957 | 0.814 | 6,265 | 9.1716 |
| 456 | 0 | 0 | 0.4 | 0.5 | 0.5 | 0.954 | 0.817 | 6,262 | 9.1713 |
| 457 | 0 | 0 | 0.4 | 0.5 | 0.6 | 0.948 | 0.821 | 6,259 | 9.1707 |

|     |   |   |     |     |     |       |       |       |        |
|-----|---|---|-----|-----|-----|-------|-------|-------|--------|
| 458 | 0 | 0 | 0.4 | 0.5 | 0.7 | 0.942 | 0.825 | 6,256 | 9.1699 |
| 459 | 0 | 0 | 0.4 | 0.5 | 0.8 | 0.932 | 0.829 | 6,252 | 9.1688 |
| 460 | 0 | 0 | 0.4 | 0.5 | 0.9 | 0.917 | 0.834 | 6,248 | 9.1671 |
| 461 | 0 | 0 | 0.4 | 0.6 | 0   | 0.960 | 0.812 | 6,267 | 9.1719 |
| 462 | 0 | 0 | 0.4 | 0.6 | 0.1 | 0.960 | 0.812 | 6,267 | 9.1719 |
| 463 | 0 | 0 | 0.4 | 0.6 | 0.2 | 0.959 | 0.812 | 6,266 | 9.1718 |
| 464 | 0 | 0 | 0.4 | 0.6 | 0.3 | 0.958 | 0.813 | 6,266 | 9.1717 |
| 465 | 0 | 0 | 0.4 | 0.6 | 0.4 | 0.955 | 0.814 | 6,265 | 9.1714 |
| 466 | 0 | 0 | 0.4 | 0.6 | 0.5 | 0.951 | 0.818 | 6,262 | 9.1710 |
| 467 | 0 | 0 | 0.4 | 0.6 | 0.6 | 0.945 | 0.822 | 6,258 | 9.1703 |
| 468 | 0 | 0 | 0.4 | 0.6 | 0.7 | 0.938 | 0.826 | 6,255 | 9.1695 |
| 469 | 0 | 0 | 0.4 | 0.6 | 0.8 | 0.927 | 0.830 | 6,252 | 9.1683 |
| 470 | 0 | 0 | 0.4 | 0.6 | 0.9 | 0.911 | 0.834 | 6,248 | 9.1664 |
| 471 | 0 | 0 | 0.4 | 0.7 | 0   | 0.960 | 0.812 | 6,267 | 9.1719 |
| 472 | 0 | 0 | 0.4 | 0.7 | 0.1 | 0.960 | 0.812 | 6,266 | 9.1719 |
| 473 | 0 | 0 | 0.4 | 0.7 | 0.2 | 0.958 | 0.812 | 6,266 | 9.1717 |
| 474 | 0 | 0 | 0.4 | 0.7 | 0.3 | 0.956 | 0.813 | 6,266 | 9.1715 |
| 475 | 0 | 0 | 0.4 | 0.7 | 0.4 | 0.953 | 0.815 | 6,264 | 9.1711 |
| 476 | 0 | 0 | 0.4 | 0.7 | 0.5 | 0.949 | 0.818 | 6,262 | 9.1707 |
| 477 | 0 | 0 | 0.4 | 0.7 | 0.6 | 0.942 | 0.822 | 6,258 | 9.1700 |
| 478 | 0 | 0 | 0.4 | 0.7 | 0.7 | 0.934 | 0.826 | 6,255 | 9.1691 |
| 479 | 0 | 0 | 0.4 | 0.7 | 0.8 | 0.923 | 0.830 | 6,251 | 9.1678 |
| 480 | 0 | 0 | 0.4 | 0.7 | 0.9 | 0.905 | 0.835 | 6,247 | 9.1658 |
| 481 | 0 | 0 | 0.4 | 0.8 | 0   | 0.960 | 0.812 | 6,267 | 9.1719 |
| 482 | 0 | 0 | 0.4 | 0.8 | 0.1 | 0.959 | 0.812 | 6,266 | 9.1718 |
| 483 | 0 | 0 | 0.4 | 0.8 | 0.2 | 0.957 | 0.812 | 6,266 | 9.1716 |
| 484 | 0 | 0 | 0.4 | 0.8 | 0.3 | 0.955 | 0.813 | 6,266 | 9.1713 |
| 485 | 0 | 0 | 0.4 | 0.8 | 0.4 | 0.951 | 0.815 | 6,264 | 9.1709 |
| 486 | 0 | 0 | 0.4 | 0.8 | 0.5 | 0.946 | 0.818 | 6,261 | 9.1704 |
| 487 | 0 | 0 | 0.4 | 0.8 | 0.6 | 0.939 | 0.822 | 6,258 | 9.1696 |
| 488 | 0 | 0 | 0.4 | 0.8 | 0.7 | 0.931 | 0.826 | 6,255 | 9.1687 |
| 489 | 0 | 0 | 0.4 | 0.8 | 0.8 | 0.919 | 0.830 | 6,251 | 9.1673 |
| 490 | 0 | 0 | 0.4 | 0.8 | 0.9 | 0.900 | 0.835 | 6,247 | 9.1652 |
| 491 | 0 | 0 | 0.4 | 0.9 | 0   | 0.960 | 0.812 | 6,266 | 9.1719 |
| 492 | 0 | 0 | 0.4 | 0.9 | 0.1 | 0.959 | 0.812 | 6,266 | 9.1718 |
| 493 | 0 | 0 | 0.4 | 0.9 | 0.2 | 0.956 | 0.812 | 6,266 | 9.1715 |
| 494 | 0 | 0 | 0.4 | 0.9 | 0.3 | 0.953 | 0.813 | 6,265 | 9.1712 |
| 495 | 0 | 0 | 0.4 | 0.9 | 0.4 | 0.949 | 0.815 | 6,264 | 9.1707 |
| 496 | 0 | 0 | 0.4 | 0.9 | 0.5 | 0.944 | 0.818 | 6,261 | 9.1702 |
| 497 | 0 | 0 | 0.4 | 0.9 | 0.6 | 0.936 | 0.823 | 6,258 | 9.1693 |
| 498 | 0 | 0 | 0.4 | 0.9 | 0.7 | 0.928 | 0.827 | 6,254 | 9.1683 |
| 499 | 0 | 0 | 0.4 | 0.9 | 0.8 | 0.915 | 0.831 | 6,251 | 9.1669 |

|     |   |   |     |     |     |       |       |       |        |
|-----|---|---|-----|-----|-----|-------|-------|-------|--------|
| 500 | 0 | 0 | 0.4 | 0.9 | 0.9 | 0.896 | 0.835 | 6,247 | 9.1647 |
| 501 | 0 | 0 | 0.5 | 0   | 0   | 0.958 | 0.824 | 6,257 | 9.1717 |
| 502 | 0 | 0 | 0.5 | 0   | 0.1 | 0.958 | 0.824 | 6,257 | 9.1717 |
| 503 | 0 | 0 | 0.5 | 0   | 0.2 | 0.958 | 0.824 | 6,257 | 9.1717 |
| 504 | 0 | 0 | 0.5 | 0   | 0.3 | 0.957 | 0.825 | 6,256 | 9.1716 |
| 505 | 0 | 0 | 0.5 | 0   | 0.4 | 0.956 | 0.827 | 6,254 | 9.1715 |
| 506 | 0 | 0 | 0.5 | 0   | 0.5 | 0.954 | 0.830 | 6,252 | 9.1713 |
| 507 | 0 | 0 | 0.5 | 0   | 0.6 | 0.952 | 0.834 | 6,249 | 9.1710 |
| 508 | 0 | 0 | 0.5 | 0   | 0.7 | 0.949 | 0.837 | 6,246 | 9.1707 |
| 509 | 0 | 0 | 0.5 | 0   | 0.8 | 0.945 | 0.840 | 6,244 | 9.1703 |
| 510 | 0 | 0 | 0.5 | 0   | 0.9 | 0.940 | 0.844 | 6,241 | 9.1698 |
| 511 | 0 | 0 | 0.5 | 0.1 | 0   | 0.958 | 0.824 | 6,257 | 9.1717 |
| 512 | 0 | 0 | 0.5 | 0.1 | 0.1 | 0.958 | 0.824 | 6,257 | 9.1717 |
| 513 | 0 | 0 | 0.5 | 0.1 | 0.2 | 0.958 | 0.824 | 6,257 | 9.1717 |
| 514 | 0 | 0 | 0.5 | 0.1 | 0.3 | 0.957 | 0.825 | 6,256 | 9.1716 |
| 515 | 0 | 0 | 0.5 | 0.1 | 0.4 | 0.956 | 0.827 | 6,254 | 9.1715 |
| 516 | 0 | 0 | 0.5 | 0.1 | 0.5 | 0.954 | 0.830 | 6,252 | 9.1712 |
| 517 | 0 | 0 | 0.5 | 0.1 | 0.6 | 0.951 | 0.834 | 6,248 | 9.1709 |
| 518 | 0 | 0 | 0.5 | 0.1 | 0.7 | 0.947 | 0.838 | 6,245 | 9.1705 |
| 519 | 0 | 0 | 0.5 | 0.1 | 0.8 | 0.942 | 0.841 | 6,242 | 9.1699 |
| 520 | 0 | 0 | 0.5 | 0.1 | 0.9 | 0.933 | 0.846 | 6,239 | 9.1689 |
| 521 | 0 | 0 | 0.5 | 0.2 | 0   | 0.958 | 0.824 | 6,257 | 9.1717 |
| 522 | 0 | 0 | 0.5 | 0.2 | 0.1 | 0.958 | 0.824 | 6,257 | 9.1717 |
| 523 | 0 | 0 | 0.5 | 0.2 | 0.2 | 0.958 | 0.824 | 6,257 | 9.1717 |
| 524 | 0 | 0 | 0.5 | 0.2 | 0.3 | 0.957 | 0.825 | 6,256 | 9.1716 |
| 525 | 0 | 0 | 0.5 | 0.2 | 0.4 | 0.956 | 0.827 | 6,254 | 9.1715 |
| 526 | 0 | 0 | 0.5 | 0.2 | 0.5 | 0.953 | 0.831 | 6,251 | 9.1711 |
| 527 | 0 | 0 | 0.5 | 0.2 | 0.6 | 0.948 | 0.835 | 6,248 | 9.1706 |
| 528 | 0 | 0 | 0.5 | 0.2 | 0.7 | 0.944 | 0.839 | 6,245 | 9.1701 |
| 529 | 0 | 0 | 0.5 | 0.2 | 0.8 | 0.936 | 0.843 | 6,241 | 9.1693 |
| 530 | 0 | 0 | 0.5 | 0.2 | 0.9 | 0.924 | 0.847 | 6,237 | 9.1680 |
| 531 | 0 | 0 | 0.5 | 0.3 | 0   | 0.958 | 0.824 | 6,256 | 9.1717 |
| 532 | 0 | 0 | 0.5 | 0.3 | 0.1 | 0.958 | 0.824 | 6,256 | 9.1717 |
| 533 | 0 | 0 | 0.5 | 0.3 | 0.2 | 0.957 | 0.824 | 6,256 | 9.1716 |
| 534 | 0 | 0 | 0.5 | 0.3 | 0.3 | 0.957 | 0.826 | 6,255 | 9.1715 |
| 535 | 0 | 0 | 0.5 | 0.3 | 0.4 | 0.955 | 0.828 | 6,254 | 9.1713 |
| 536 | 0 | 0 | 0.5 | 0.3 | 0.5 | 0.951 | 0.831 | 6,251 | 9.1709 |
| 537 | 0 | 0 | 0.5 | 0.3 | 0.6 | 0.946 | 0.836 | 6,247 | 9.1703 |
| 538 | 0 | 0 | 0.5 | 0.3 | 0.7 | 0.939 | 0.840 | 6,244 | 9.1697 |
| 539 | 0 | 0 | 0.5 | 0.3 | 0.8 | 0.930 | 0.844 | 6,240 | 9.1686 |
| 540 | 0 | 0 | 0.5 | 0.3 | 0.9 | 0.917 | 0.849 | 6,236 | 9.1671 |
| 541 | 0 | 0 | 0.5 | 0.4 | 0   | 0.957 | 0.824 | 6,256 | 9.1716 |

|     |   |   |     |     |     |       |       |       |        |
|-----|---|---|-----|-----|-----|-------|-------|-------|--------|
| 542 | 0 | 0 | 0.5 | 0.4 | 0.1 | 0.957 | 0.824 | 6,256 | 9.1716 |
| 543 | 0 | 0 | 0.5 | 0.4 | 0.2 | 0.957 | 0.825 | 6,256 | 9.1716 |
| 544 | 0 | 0 | 0.5 | 0.4 | 0.3 | 0.956 | 0.826 | 6,255 | 9.1714 |
| 545 | 0 | 0 | 0.5 | 0.4 | 0.4 | 0.953 | 0.828 | 6,253 | 9.1711 |
| 546 | 0 | 0 | 0.5 | 0.4 | 0.5 | 0.949 | 0.832 | 6,250 | 9.1707 |
| 547 | 0 | 0 | 0.5 | 0.4 | 0.6 | 0.942 | 0.837 | 6,246 | 9.1700 |
| 548 | 0 | 0 | 0.5 | 0.4 | 0.7 | 0.935 | 0.841 | 6,243 | 9.1692 |
| 549 | 0 | 0 | 0.5 | 0.4 | 0.8 | 0.925 | 0.845 | 6,239 | 9.1680 |
| 550 | 0 | 0 | 0.5 | 0.4 | 0.9 | 0.909 | 0.850 | 6,235 | 9.1662 |
| 551 | 0 | 0 | 0.5 | 0.5 | 0   | 0.957 | 0.825 | 6,256 | 9.1716 |
| 552 | 0 | 0 | 0.5 | 0.5 | 0.1 | 0.957 | 0.825 | 6,256 | 9.1716 |
| 553 | 0 | 0 | 0.5 | 0.5 | 0.2 | 0.956 | 0.825 | 6,256 | 9.1715 |
| 554 | 0 | 0 | 0.5 | 0.5 | 0.3 | 0.954 | 0.826 | 6,255 | 9.1712 |
| 555 | 0 | 0 | 0.5 | 0.5 | 0.4 | 0.950 | 0.829 | 6,253 | 9.1709 |
| 556 | 0 | 0 | 0.5 | 0.5 | 0.5 | 0.945 | 0.833 | 6,250 | 9.1703 |
| 557 | 0 | 0 | 0.5 | 0.5 | 0.6 | 0.938 | 0.837 | 6,246 | 9.1695 |
| 558 | 0 | 0 | 0.5 | 0.5 | 0.7 | 0.930 | 0.842 | 6,242 | 9.1686 |
| 559 | 0 | 0 | 0.5 | 0.5 | 0.8 | 0.919 | 0.846 | 6,239 | 9.1673 |
| 560 | 0 | 0 | 0.5 | 0.5 | 0.9 | 0.901 | 0.851 | 6,234 | 9.1652 |
| 561 | 0 | 0 | 0.5 | 0.6 | 0   | 0.957 | 0.825 | 6,256 | 9.1716 |
| 562 | 0 | 0 | 0.5 | 0.6 | 0.1 | 0.957 | 0.825 | 6,256 | 9.1715 |
| 563 | 0 | 0 | 0.5 | 0.6 | 0.2 | 0.955 | 0.825 | 6,256 | 9.1713 |
| 564 | 0 | 0 | 0.5 | 0.6 | 0.3 | 0.952 | 0.827 | 6,254 | 9.1710 |
| 565 | 0 | 0 | 0.5 | 0.6 | 0.4 | 0.947 | 0.829 | 6,252 | 9.1705 |
| 566 | 0 | 0 | 0.5 | 0.6 | 0.5 | 0.941 | 0.833 | 6,249 | 9.1699 |
| 567 | 0 | 0 | 0.5 | 0.6 | 0.6 | 0.933 | 0.838 | 6,245 | 9.1690 |
| 568 | 0 | 0 | 0.5 | 0.6 | 0.7 | 0.924 | 0.842 | 6,242 | 9.1679 |
| 569 | 0 | 0 | 0.5 | 0.6 | 0.8 | 0.911 | 0.846 | 6,238 | 9.1665 |
| 570 | 0 | 0 | 0.5 | 0.6 | 0.9 | 0.892 | 0.852 | 6,233 | 9.1642 |
| 571 | 0 | 0 | 0.5 | 0.7 | 0   | 0.957 | 0.825 | 6,256 | 9.1716 |
| 572 | 0 | 0 | 0.5 | 0.7 | 0.1 | 0.956 | 0.825 | 6,256 | 9.1715 |
| 573 | 0 | 0 | 0.5 | 0.7 | 0.2 | 0.953 | 0.825 | 6,255 | 9.1712 |
| 574 | 0 | 0 | 0.5 | 0.7 | 0.3 | 0.949 | 0.827 | 6,254 | 9.1708 |
| 575 | 0 | 0 | 0.5 | 0.7 | 0.4 | 0.944 | 0.830 | 6,252 | 9.1702 |
| 576 | 0 | 0 | 0.5 | 0.7 | 0.5 | 0.937 | 0.834 | 6,249 | 9.1694 |
| 577 | 0 | 0 | 0.5 | 0.7 | 0.6 | 0.929 | 0.838 | 6,245 | 9.1685 |
| 578 | 0 | 0 | 0.5 | 0.7 | 0.7 | 0.919 | 0.843 | 6,241 | 9.1673 |
| 579 | 0 | 0 | 0.5 | 0.7 | 0.8 | 0.905 | 0.847 | 6,237 | 9.1657 |
| 580 | 0 | 0 | 0.5 | 0.7 | 0.9 | 0.884 | 0.852 | 6,233 | 9.1633 |
| 581 | 0 | 0 | 0.5 | 0.8 | 0   | 0.957 | 0.825 | 6,256 | 9.1716 |
| 582 | 0 | 0 | 0.5 | 0.8 | 0.1 | 0.955 | 0.825 | 6,256 | 9.1714 |
| 583 | 0 | 0 | 0.5 | 0.8 | 0.2 | 0.952 | 0.826 | 6,255 | 9.1710 |

|     |   |   |     |     |     |       |       |       |        |
|-----|---|---|-----|-----|-----|-------|-------|-------|--------|
| 584 | 0 | 0 | 0.5 | 0.8 | 0.3 | 0.947 | 0.827 | 6,254 | 9.1705 |
| 585 | 0 | 0 | 0.5 | 0.8 | 0.4 | 0.942 | 0.830 | 6,252 | 9.1699 |
| 586 | 0 | 0 | 0.5 | 0.8 | 0.5 | 0.934 | 0.834 | 6,248 | 9.1691 |
| 587 | 0 | 0 | 0.5 | 0.8 | 0.6 | 0.925 | 0.839 | 6,244 | 9.1680 |
| 588 | 0 | 0 | 0.5 | 0.8 | 0.7 | 0.914 | 0.843 | 6,241 | 9.1668 |
| 589 | 0 | 0 | 0.5 | 0.8 | 0.8 | 0.900 | 0.847 | 6,237 | 9.1651 |
| 590 | 0 | 0 | 0.5 | 0.8 | 0.9 | 0.878 | 0.853 | 6,232 | 9.1625 |
| 591 | 0 | 0 | 0.5 | 0.9 | 0   | 0.957 | 0.825 | 6,256 | 9.1716 |
| 592 | 0 | 0 | 0.5 | 0.9 | 0.1 | 0.955 | 0.825 | 6,256 | 9.1714 |
| 593 | 0 | 0 | 0.5 | 0.9 | 0.2 | 0.951 | 0.826 | 6,255 | 9.1709 |
| 594 | 0 | 0 | 0.5 | 0.9 | 0.3 | 0.946 | 0.827 | 6,254 | 9.1703 |
| 595 | 0 | 0 | 0.5 | 0.9 | 0.4 | 0.939 | 0.830 | 6,252 | 9.1696 |
| 596 | 0 | 0 | 0.5 | 0.9 | 0.5 | 0.931 | 0.834 | 6,248 | 9.1687 |
| 597 | 0 | 0 | 0.5 | 0.9 | 0.6 | 0.921 | 0.839 | 6,244 | 9.1676 |
| 598 | 0 | 0 | 0.5 | 0.9 | 0.7 | 0.910 | 0.843 | 6,240 | 9.1663 |
| 599 | 0 | 0 | 0.5 | 0.9 | 0.8 | 0.895 | 0.848 | 6,237 | 9.1646 |
| 600 | 0 | 0 | 0.5 | 0.9 | 0.9 | 0.873 | 0.853 | 6,232 | 9.1619 |
| 601 | 0 | 0 | 0.6 | 0   | 0   | 0.954 | 0.837 | 6,246 | 9.1713 |
| 602 | 0 | 0 | 0.6 | 0   | 0.1 | 0.954 | 0.837 | 6,246 | 9.1713 |
| 603 | 0 | 0 | 0.6 | 0   | 0.2 | 0.954 | 0.837 | 6,246 | 9.1713 |
| 604 | 0 | 0 | 0.6 | 0   | 0.3 | 0.953 | 0.838 | 6,245 | 9.1712 |
| 605 | 0 | 0 | 0.6 | 0   | 0.4 | 0.952 | 0.841 | 6,243 | 9.1710 |
| 606 | 0 | 0 | 0.6 | 0   | 0.5 | 0.949 | 0.844 | 6,241 | 9.1708 |
| 607 | 0 | 0 | 0.6 | 0   | 0.6 | 0.947 | 0.848 | 6,237 | 9.1705 |
| 608 | 0 | 0 | 0.6 | 0   | 0.7 | 0.944 | 0.851 | 6,235 | 9.1701 |
| 609 | 0 | 0 | 0.6 | 0   | 0.8 | 0.940 | 0.854 | 6,232 | 9.1697 |
| 610 | 0 | 0 | 0.6 | 0   | 0.9 | 0.935 | 0.858 | 6,229 | 9.1691 |
| 611 | 0 | 0 | 0.6 | 0.1 | 0   | 0.954 | 0.837 | 6,246 | 9.1713 |
| 612 | 0 | 0 | 0.6 | 0.1 | 0.1 | 0.954 | 0.837 | 6,246 | 9.1713 |
| 613 | 0 | 0 | 0.6 | 0.1 | 0.2 | 0.954 | 0.837 | 6,246 | 9.1713 |
| 614 | 0 | 0 | 0.6 | 0.1 | 0.3 | 0.953 | 0.838 | 6,245 | 9.1711 |
| 615 | 0 | 0 | 0.6 | 0.1 | 0.4 | 0.951 | 0.841 | 6,243 | 9.1710 |
| 616 | 0 | 0 | 0.6 | 0.1 | 0.5 | 0.948 | 0.844 | 6,240 | 9.1707 |
| 617 | 0 | 0 | 0.6 | 0.1 | 0.6 | 0.945 | 0.849 | 6,237 | 9.1703 |
| 618 | 0 | 0 | 0.6 | 0.1 | 0.7 | 0.941 | 0.853 | 6,234 | 9.1698 |
| 619 | 0 | 0 | 0.6 | 0.1 | 0.8 | 0.935 | 0.856 | 6,230 | 9.1691 |
| 620 | 0 | 0 | 0.6 | 0.1 | 0.9 | 0.925 | 0.861 | 6,227 | 9.1680 |
| 621 | 0 | 0 | 0.6 | 0.2 | 0   | 0.954 | 0.837 | 6,246 | 9.1713 |
| 622 | 0 | 0 | 0.6 | 0.2 | 0.1 | 0.954 | 0.837 | 6,246 | 9.1713 |
| 623 | 0 | 0 | 0.6 | 0.2 | 0.2 | 0.954 | 0.837 | 6,246 | 9.1712 |
| 624 | 0 | 0 | 0.6 | 0.2 | 0.3 | 0.952 | 0.839 | 6,244 | 9.1710 |
| 625 | 0 | 0 | 0.6 | 0.2 | 0.4 | 0.950 | 0.842 | 6,242 | 9.1708 |



|     |   |   |     |     |     |       |       |       |        |
|-----|---|---|-----|-----|-----|-------|-------|-------|--------|
| 626 | 0 | 0 | 0.6 | 0.2 | 0.5 | 0.946 | 0.846 | 6,239 | 9.1704 |
| 627 | 0 | 0 | 0.6 | 0.2 | 0.6 | 0.941 | 0.850 | 6,235 | 9.1698 |
| 628 | 0 | 0 | 0.6 | 0.2 | 0.7 | 0.935 | 0.854 | 6,232 | 9.1692 |
| 629 | 0 | 0 | 0.6 | 0.2 | 0.8 | 0.927 | 0.858 | 6,229 | 9.1683 |
| 630 | 0 | 0 | 0.6 | 0.2 | 0.9 | 0.914 | 0.863 | 6,224 | 9.1667 |
| 631 | 0 | 0 | 0.6 | 0.3 | 0   | 0.954 | 0.837 | 6,246 | 9.1713 |
| 632 | 0 | 0 | 0.6 | 0.3 | 0.1 | 0.954 | 0.837 | 6,246 | 9.1713 |
| 633 | 0 | 0 | 0.6 | 0.3 | 0.2 | 0.953 | 0.838 | 6,245 | 9.1712 |
| 634 | 0 | 0 | 0.6 | 0.3 | 0.3 | 0.950 | 0.840 | 6,244 | 9.1709 |
| 635 | 0 | 0 | 0.6 | 0.3 | 0.4 | 0.947 | 0.843 | 6,241 | 9.1705 |
| 636 | 0 | 0 | 0.6 | 0.3 | 0.5 | 0.942 | 0.847 | 6,238 | 9.1700 |
| 637 | 0 | 0 | 0.6 | 0.3 | 0.6 | 0.936 | 0.852 | 6,234 | 9.1693 |
| 638 | 0 | 0 | 0.6 | 0.3 | 0.7 | 0.929 | 0.856 | 6,231 | 9.1685 |
| 639 | 0 | 0 | 0.6 | 0.3 | 0.8 | 0.918 | 0.860 | 6,227 | 9.1672 |
| 640 | 0 | 0 | 0.6 | 0.3 | 0.9 | 0.902 | 0.865 | 6,223 | 9.1654 |
| 641 | 0 | 0 | 0.6 | 0.4 | 0   | 0.954 | 0.837 | 6,246 | 9.1712 |
| 642 | 0 | 0 | 0.6 | 0.4 | 0.1 | 0.953 | 0.838 | 6,246 | 9.1712 |
| 643 | 0 | 0 | 0.6 | 0.4 | 0.2 | 0.951 | 0.839 | 6,245 | 9.1710 |
| 644 | 0 | 0 | 0.6 | 0.4 | 0.3 | 0.948 | 0.841 | 6,243 | 9.1706 |
| 645 | 0 | 0 | 0.6 | 0.4 | 0.4 | 0.943 | 0.844 | 6,240 | 9.1701 |
| 646 | 0 | 0 | 0.6 | 0.4 | 0.5 | 0.938 | 0.848 | 6,237 | 9.1695 |
| 647 | 0 | 0 | 0.6 | 0.4 | 0.6 | 0.930 | 0.853 | 6,233 | 9.1686 |
| 648 | 0 | 0 | 0.6 | 0.4 | 0.7 | 0.921 | 0.858 | 6,229 | 9.1676 |
| 649 | 0 | 0 | 0.6 | 0.4 | 0.8 | 0.909 | 0.862 | 6,225 | 9.1662 |
| 650 | 0 | 0 | 0.6 | 0.4 | 0.9 | 0.889 | 0.867 | 6,221 | 9.1639 |
| 651 | 0 | 0 | 0.6 | 0.5 | 0   | 0.954 | 0.837 | 6,246 | 9.1712 |
| 652 | 0 | 0 | 0.6 | 0.5 | 0.1 | 0.952 | 0.838 | 6,245 | 9.1711 |
| 653 | 0 | 0 | 0.6 | 0.5 | 0.2 | 0.950 | 0.839 | 6,244 | 9.1708 |
| 654 | 0 | 0 | 0.6 | 0.5 | 0.3 | 0.945 | 0.842 | 6,242 | 9.1703 |
| 655 | 0 | 0 | 0.6 | 0.5 | 0.4 | 0.939 | 0.845 | 6,240 | 9.1697 |
| 656 | 0 | 0 | 0.6 | 0.5 | 0.5 | 0.932 | 0.849 | 6,236 | 9.1689 |
| 657 | 0 | 0 | 0.6 | 0.5 | 0.6 | 0.923 | 0.854 | 6,232 | 9.1679 |
| 658 | 0 | 0 | 0.6 | 0.5 | 0.7 | 0.913 | 0.859 | 6,228 | 9.1667 |
| 659 | 0 | 0 | 0.6 | 0.5 | 0.8 | 0.899 | 0.864 | 6,224 | 9.1651 |
| 660 | 0 | 0 | 0.6 | 0.5 | 0.9 | 0.877 | 0.869 | 6,219 | 9.1624 |
| 661 | 0 | 0 | 0.6 | 0.6 | 0   | 0.953 | 0.837 | 6,246 | 9.1712 |
| 662 | 0 | 0 | 0.6 | 0.6 | 0.1 | 0.952 | 0.838 | 6,245 | 9.1710 |
| 663 | 0 | 0 | 0.6 | 0.6 | 0.2 | 0.948 | 0.840 | 6,244 | 9.1706 |
| 664 | 0 | 0 | 0.6 | 0.6 | 0.3 | 0.942 | 0.842 | 6,242 | 9.1699 |
| 665 | 0 | 0 | 0.6 | 0.6 | 0.4 | 0.935 | 0.846 | 6,239 | 9.1692 |
| 666 | 0 | 0 | 0.6 | 0.6 | 0.5 | 0.927 | 0.850 | 6,235 | 9.1683 |
| 667 | 0 | 0 | 0.6 | 0.6 | 0.6 | 0.917 | 0.855 | 6,231 | 9.1671 |

|     |   |   |     |     |     |       |       |       |        |
|-----|---|---|-----|-----|-----|-------|-------|-------|--------|
| 668 | 0 | 0 | 0.6 | 0.6 | 0.7 | 0.905 | 0.860 | 6,227 | 9.1657 |
| 669 | 0 | 0 | 0.6 | 0.6 | 0.8 | 0.889 | 0.864 | 6,223 | 9.1639 |
| 670 | 0 | 0 | 0.6 | 0.6 | 0.9 | 0.865 | 0.870 | 6,218 | 9.1610 |
| 671 | 0 | 0 | 0.6 | 0.7 | 0   | 0.953 | 0.838 | 6,246 | 9.1712 |
| 672 | 0 | 0 | 0.6 | 0.7 | 0.1 | 0.951 | 0.838 | 6,245 | 9.1709 |
| 673 | 0 | 0 | 0.6 | 0.7 | 0.2 | 0.946 | 0.840 | 6,244 | 9.1704 |
| 674 | 0 | 0 | 0.6 | 0.7 | 0.3 | 0.939 | 0.843 | 6,241 | 9.1696 |
| 675 | 0 | 0 | 0.6 | 0.7 | 0.4 | 0.930 | 0.846 | 6,239 | 9.1686 |
| 676 | 0 | 0 | 0.6 | 0.7 | 0.5 | 0.921 | 0.851 | 6,235 | 9.1676 |
| 677 | 0 | 0 | 0.6 | 0.7 | 0.6 | 0.910 | 0.856 | 6,230 | 9.1664 |
| 678 | 0 | 0 | 0.6 | 0.7 | 0.7 | 0.897 | 0.860 | 6,226 | 9.1649 |
| 679 | 0 | 0 | 0.6 | 0.7 | 0.8 | 0.881 | 0.865 | 6,222 | 9.1629 |
| 680 | 0 | 0 | 0.6 | 0.7 | 0.9 | 0.855 | 0.871 | 6,217 | 9.1597 |
| 681 | 0 | 0 | 0.6 | 0.8 | 0   | 0.953 | 0.838 | 6,246 | 9.1712 |
| 682 | 0 | 0 | 0.6 | 0.8 | 0.1 | 0.950 | 0.838 | 6,245 | 9.1709 |
| 683 | 0 | 0 | 0.6 | 0.8 | 0.2 | 0.944 | 0.840 | 6,244 | 9.1702 |
| 684 | 0 | 0 | 0.6 | 0.8 | 0.3 | 0.936 | 0.843 | 6,241 | 9.1693 |
| 685 | 0 | 0 | 0.6 | 0.8 | 0.4 | 0.927 | 0.847 | 6,238 | 9.1683 |
| 686 | 0 | 0 | 0.6 | 0.8 | 0.5 | 0.917 | 0.851 | 6,234 | 9.1671 |
| 687 | 0 | 0 | 0.6 | 0.8 | 0.6 | 0.905 | 0.856 | 6,230 | 9.1658 |
| 688 | 0 | 0 | 0.6 | 0.8 | 0.7 | 0.891 | 0.861 | 6,226 | 9.1642 |
| 689 | 0 | 0 | 0.6 | 0.8 | 0.8 | 0.874 | 0.866 | 6,222 | 9.1620 |
| 690 | 0 | 0 | 0.6 | 0.8 | 0.9 | 0.846 | 0.871 | 6,217 | 9.1586 |
| 691 | 0 | 0 | 0.6 | 0.9 | 0   | 0.953 | 0.838 | 6,246 | 9.1712 |
| 692 | 0 | 0 | 0.6 | 0.9 | 0.1 | 0.950 | 0.838 | 6,245 | 9.1708 |
| 693 | 0 | 0 | 0.6 | 0.9 | 0.2 | 0.942 | 0.840 | 6,243 | 9.1700 |
| 694 | 0 | 0 | 0.6 | 0.9 | 0.3 | 0.934 | 0.843 | 6,241 | 9.1690 |
| 695 | 0 | 0 | 0.6 | 0.9 | 0.4 | 0.924 | 0.847 | 6,238 | 9.1680 |
| 696 | 0 | 0 | 0.6 | 0.9 | 0.5 | 0.914 | 0.851 | 6,234 | 9.1668 |
| 697 | 0 | 0 | 0.6 | 0.9 | 0.6 | 0.901 | 0.857 | 6,230 | 9.1653 |
| 698 | 0 | 0 | 0.6 | 0.9 | 0.7 | 0.887 | 0.861 | 6,226 | 9.1636 |
| 699 | 0 | 0 | 0.6 | 0.9 | 0.8 | 0.869 | 0.866 | 6,221 | 9.1614 |
| 700 | 0 | 0 | 0.6 | 0.9 | 0.9 | 0.840 | 0.871 | 6,216 | 9.1578 |
| 701 | 0 | 0 | 0.7 | 0   | 0   | 0.951 | 0.847 | 6,238 | 9.1709 |
| 702 | 0 | 0 | 0.7 | 0   | 0.1 | 0.951 | 0.847 | 6,238 | 9.1709 |
| 703 | 0 | 0 | 0.7 | 0   | 0.2 | 0.950 | 0.848 | 6,238 | 9.1709 |
| 704 | 0 | 0 | 0.7 | 0   | 0.3 | 0.949 | 0.849 | 6,236 | 9.1707 |
| 705 | 0 | 0 | 0.7 | 0   | 0.4 | 0.947 | 0.852 | 6,234 | 9.1705 |
| 706 | 0 | 0 | 0.7 | 0   | 0.5 | 0.945 | 0.855 | 6,231 | 9.1703 |
| 707 | 0 | 0 | 0.7 | 0   | 0.6 | 0.942 | 0.859 | 6,228 | 9.1699 |
| 708 | 0 | 0 | 0.7 | 0   | 0.7 | 0.939 | 0.862 | 6,225 | 9.1696 |
| 709 | 0 | 0 | 0.7 | 0   | 0.8 | 0.935 | 0.866 | 6,223 | 9.1691 |

|     |   |   |     |     |     |       |       |       |        |
|-----|---|---|-----|-----|-----|-------|-------|-------|--------|
| 710 | 0 | 0 | 0.7 | 0   | 0.9 | 0.929 | 0.870 | 6,220 | 9.1685 |
| 711 | 0 | 0 | 0.7 | 0.1 | 0   | 0.951 | 0.847 | 6,238 | 9.1709 |
| 712 | 0 | 0 | 0.7 | 0.1 | 0.1 | 0.951 | 0.847 | 6,238 | 9.1709 |
| 713 | 0 | 0 | 0.7 | 0.1 | 0.2 | 0.950 | 0.848 | 6,237 | 9.1708 |
| 714 | 0 | 0 | 0.7 | 0.1 | 0.3 | 0.948 | 0.850 | 6,236 | 9.1706 |
| 715 | 0 | 0 | 0.7 | 0.1 | 0.4 | 0.946 | 0.853 | 6,233 | 9.1704 |
| 716 | 0 | 0 | 0.7 | 0.1 | 0.5 | 0.943 | 0.856 | 6,230 | 9.1701 |
| 717 | 0 | 0 | 0.7 | 0.1 | 0.6 | 0.939 | 0.861 | 6,227 | 9.1696 |
| 718 | 0 | 0 | 0.7 | 0.1 | 0.7 | 0.934 | 0.865 | 6,224 | 9.1691 |
| 719 | 0 | 0 | 0.7 | 0.1 | 0.8 | 0.928 | 0.869 | 6,220 | 9.1683 |
| 720 | 0 | 0 | 0.7 | 0.1 | 0.9 | 0.917 | 0.873 | 6,216 | 9.1671 |
| 721 | 0 | 0 | 0.7 | 0.2 | 0   | 0.950 | 0.847 | 6,238 | 9.1709 |
| 722 | 0 | 0 | 0.7 | 0.2 | 0.1 | 0.950 | 0.847 | 6,238 | 9.1708 |
| 723 | 0 | 0 | 0.7 | 0.2 | 0.2 | 0.948 | 0.849 | 6,236 | 9.1706 |
| 724 | 0 | 0 | 0.7 | 0.2 | 0.3 | 0.945 | 0.852 | 6,234 | 9.1703 |
| 725 | 0 | 0 | 0.7 | 0.2 | 0.4 | 0.942 | 0.855 | 6,232 | 9.1700 |
| 726 | 0 | 0 | 0.7 | 0.2 | 0.5 | 0.938 | 0.859 | 6,228 | 9.1695 |
| 727 | 0 | 0 | 0.7 | 0.2 | 0.6 | 0.932 | 0.864 | 6,224 | 9.1688 |
| 728 | 0 | 0 | 0.7 | 0.2 | 0.7 | 0.925 | 0.868 | 6,221 | 9.1681 |
| 729 | 0 | 0 | 0.7 | 0.2 | 0.8 | 0.916 | 0.872 | 6,217 | 9.1670 |
| 730 | 0 | 0 | 0.7 | 0.2 | 0.9 | 0.901 | 0.878 | 6,213 | 9.1652 |
| 731 | 0 | 0 | 0.7 | 0.3 | 0   | 0.950 | 0.848 | 6,237 | 9.1708 |
| 732 | 0 | 0 | 0.7 | 0.3 | 0.1 | 0.949 | 0.848 | 6,237 | 9.1707 |
| 733 | 0 | 0 | 0.7 | 0.3 | 0.2 | 0.946 | 0.851 | 6,235 | 9.1703 |
| 734 | 0 | 0 | 0.7 | 0.3 | 0.3 | 0.941 | 0.854 | 6,233 | 9.1699 |
| 735 | 0 | 0 | 0.7 | 0.3 | 0.4 | 0.937 | 0.857 | 6,230 | 9.1693 |
| 736 | 0 | 0 | 0.7 | 0.3 | 0.5 | 0.931 | 0.862 | 6,226 | 9.1687 |
| 737 | 0 | 0 | 0.7 | 0.3 | 0.6 | 0.923 | 0.867 | 6,222 | 9.1678 |
| 738 | 0 | 0 | 0.7 | 0.3 | 0.7 | 0.914 | 0.871 | 6,218 | 9.1668 |
| 739 | 0 | 0 | 0.7 | 0.3 | 0.8 | 0.902 | 0.876 | 6,214 | 9.1653 |
| 740 | 0 | 0 | 0.7 | 0.3 | 0.9 | 0.883 | 0.881 | 6,209 | 9.1631 |
| 741 | 0 | 0 | 0.7 | 0.4 | 0   | 0.950 | 0.848 | 6,237 | 9.1708 |
| 742 | 0 | 0 | 0.7 | 0.4 | 0.1 | 0.947 | 0.849 | 6,236 | 9.1705 |
| 743 | 0 | 0 | 0.7 | 0.4 | 0.2 | 0.942 | 0.852 | 6,234 | 9.1700 |
| 744 | 0 | 0 | 0.7 | 0.4 | 0.3 | 0.937 | 0.855 | 6,231 | 9.1694 |
| 745 | 0 | 0 | 0.7 | 0.4 | 0.4 | 0.931 | 0.859 | 6,228 | 9.1687 |
| 746 | 0 | 0 | 0.7 | 0.4 | 0.5 | 0.923 | 0.864 | 6,224 | 9.1679 |
| 747 | 0 | 0 | 0.7 | 0.4 | 0.6 | 0.914 | 0.869 | 6,220 | 9.1668 |
| 748 | 0 | 0 | 0.7 | 0.4 | 0.7 | 0.903 | 0.874 | 6,216 | 9.1655 |
| 749 | 0 | 0 | 0.7 | 0.4 | 0.8 | 0.888 | 0.879 | 6,212 | 9.1637 |
| 750 | 0 | 0 | 0.7 | 0.4 | 0.9 | 0.865 | 0.884 | 6,207 | 9.1610 |
| 751 | 0 | 0 | 0.7 | 0.5 | 0   | 0.949 | 0.848 | 6,237 | 9.1707 |

|     |   |   |     |     |     |       |       |       |        |
|-----|---|---|-----|-----|-----|-------|-------|-------|--------|
| 752 | 0 | 0 | 0.7 | 0.5 | 0.1 | 0.946 | 0.850 | 6,236 | 9.1704 |
| 753 | 0 | 0 | 0.7 | 0.5 | 0.2 | 0.940 | 0.853 | 6,234 | 9.1697 |
| 754 | 0 | 0 | 0.7 | 0.5 | 0.3 | 0.932 | 0.856 | 6,230 | 9.1689 |
| 755 | 0 | 0 | 0.7 | 0.5 | 0.4 | 0.925 | 0.860 | 6,227 | 9.1680 |
| 756 | 0 | 0 | 0.7 | 0.5 | 0.5 | 0.916 | 0.865 | 6,223 | 9.1670 |
| 757 | 0 | 0 | 0.7 | 0.5 | 0.6 | 0.904 | 0.871 | 6,218 | 9.1657 |
| 758 | 0 | 0 | 0.7 | 0.5 | 0.7 | 0.891 | 0.875 | 6,214 | 9.1641 |
| 759 | 0 | 0 | 0.7 | 0.5 | 0.8 | 0.874 | 0.880 | 6,210 | 9.1621 |
| 760 | 0 | 0 | 0.7 | 0.5 | 0.9 | 0.848 | 0.886 | 6,205 | 9.1588 |
| 761 | 0 | 0 | 0.7 | 0.6 | 0   | 0.949 | 0.848 | 6,237 | 9.1707 |
| 762 | 0 | 0 | 0.7 | 0.6 | 0.1 | 0.945 | 0.850 | 6,236 | 9.1703 |
| 763 | 0 | 0 | 0.7 | 0.6 | 0.2 | 0.937 | 0.853 | 6,233 | 9.1694 |
| 764 | 0 | 0 | 0.7 | 0.6 | 0.3 | 0.928 | 0.857 | 6,230 | 9.1684 |
| 765 | 0 | 0 | 0.7 | 0.6 | 0.4 | 0.919 | 0.861 | 6,226 | 9.1673 |
| 766 | 0 | 0 | 0.7 | 0.6 | 0.5 | 0.908 | 0.866 | 6,222 | 9.1661 |
| 767 | 0 | 0 | 0.7 | 0.6 | 0.6 | 0.896 | 0.872 | 6,217 | 9.1646 |
| 768 | 0 | 0 | 0.7 | 0.6 | 0.7 | 0.881 | 0.877 | 6,213 | 9.1629 |
| 769 | 0 | 0 | 0.7 | 0.6 | 0.8 | 0.862 | 0.882 | 6,209 | 9.1605 |
| 770 | 0 | 0 | 0.7 | 0.6 | 0.9 | 0.832 | 0.887 | 6,203 | 9.1568 |
| 771 | 0 | 0 | 0.7 | 0.7 | 0   | 0.949 | 0.848 | 6,237 | 9.1707 |
| 772 | 0 | 0 | 0.7 | 0.7 | 0.1 | 0.944 | 0.850 | 6,236 | 9.1702 |
| 773 | 0 | 0 | 0.7 | 0.7 | 0.2 | 0.935 | 0.853 | 6,233 | 9.1691 |
| 774 | 0 | 0 | 0.7 | 0.7 | 0.3 | 0.924 | 0.857 | 6,229 | 9.1679 |
| 775 | 0 | 0 | 0.7 | 0.7 | 0.4 | 0.913 | 0.862 | 6,226 | 9.1667 |
| 776 | 0 | 0 | 0.7 | 0.7 | 0.5 | 0.902 | 0.867 | 6,221 | 9.1654 |
| 777 | 0 | 0 | 0.7 | 0.7 | 0.6 | 0.888 | 0.872 | 6,217 | 9.1637 |
| 778 | 0 | 0 | 0.7 | 0.7 | 0.7 | 0.872 | 0.877 | 6,212 | 9.1618 |
| 779 | 0 | 0 | 0.7 | 0.7 | 0.8 | 0.851 | 0.882 | 6,208 | 9.1592 |
| 780 | 0 | 0 | 0.7 | 0.7 | 0.9 | 0.819 | 0.888 | 6,202 | 9.1551 |
| 781 | 0 | 0 | 0.7 | 0.8 | 0   | 0.949 | 0.848 | 6,237 | 9.1707 |
| 782 | 0 | 0 | 0.7 | 0.8 | 0.1 | 0.943 | 0.850 | 6,236 | 9.1701 |
| 783 | 0 | 0 | 0.7 | 0.8 | 0.2 | 0.932 | 0.854 | 6,233 | 9.1689 |
| 784 | 0 | 0 | 0.7 | 0.8 | 0.3 | 0.920 | 0.858 | 6,229 | 9.1675 |
| 785 | 0 | 0 | 0.7 | 0.8 | 0.4 | 0.909 | 0.862 | 6,225 | 9.1662 |
| 786 | 0 | 0 | 0.7 | 0.8 | 0.5 | 0.896 | 0.867 | 6,221 | 9.1647 |
| 787 | 0 | 0 | 0.7 | 0.8 | 0.6 | 0.881 | 0.873 | 6,216 | 9.1629 |
| 788 | 0 | 0 | 0.7 | 0.8 | 0.7 | 0.864 | 0.878 | 6,212 | 9.1608 |
| 789 | 0 | 0 | 0.7 | 0.8 | 0.8 | 0.842 | 0.883 | 6,207 | 9.1581 |
| 790 | 0 | 0 | 0.7 | 0.8 | 0.9 | 0.808 | 0.889 | 6,201 | 9.1537 |
| 791 | 0 | 0 | 0.7 | 0.9 | 0   | 0.949 | 0.848 | 6,237 | 9.1707 |
| 792 | 0 | 0 | 0.7 | 0.9 | 0.1 | 0.943 | 0.850 | 6,235 | 9.1700 |
| 793 | 0 | 0 | 0.7 | 0.9 | 0.2 | 0.930 | 0.854 | 6,232 | 9.1687 |

|     |   |   |     |     |     |       |       |       |        |
|-----|---|---|-----|-----|-----|-------|-------|-------|--------|
| 794 | 0 | 0 | 0.7 | 0.9 | 0.3 | 0.918 | 0.858 | 6,229 | 9.1672 |
| 795 | 0 | 0 | 0.7 | 0.9 | 0.4 | 0.906 | 0.862 | 6,225 | 9.1658 |
| 796 | 0 | 0 | 0.7 | 0.9 | 0.5 | 0.892 | 0.868 | 6,221 | 9.1643 |
| 797 | 0 | 0 | 0.7 | 0.9 | 0.6 | 0.876 | 0.873 | 6,216 | 9.1623 |
| 798 | 0 | 0 | 0.7 | 0.9 | 0.7 | 0.859 | 0.878 | 6,211 | 9.1602 |
| 799 | 0 | 0 | 0.7 | 0.9 | 0.8 | 0.836 | 0.883 | 6,207 | 9.1573 |
| 800 | 0 | 0 | 0.7 | 0.9 | 0.9 | 0.801 | 0.889 | 6,201 | 9.1527 |
| 801 | 0 | 0 | 0.8 | 0   | 0   | 0.947 | 0.856 | 6,231 | 9.1705 |
| 802 | 0 | 0 | 0.8 | 0   | 0.1 | 0.947 | 0.856 | 6,231 | 9.1705 |
| 803 | 0 | 0 | 0.8 | 0   | 0.2 | 0.946 | 0.857 | 6,230 | 9.1704 |
| 804 | 0 | 0 | 0.8 | 0   | 0.3 | 0.944 | 0.859 | 6,228 | 9.1702 |
| 805 | 0 | 0 | 0.8 | 0   | 0.4 | 0.943 | 0.862 | 6,226 | 9.1700 |
| 806 | 0 | 0 | 0.8 | 0   | 0.5 | 0.940 | 0.865 | 6,223 | 9.1697 |
| 807 | 0 | 0 | 0.8 | 0   | 0.6 | 0.937 | 0.869 | 6,220 | 9.1694 |
| 808 | 0 | 0 | 0.8 | 0   | 0.7 | 0.934 | 0.873 | 6,217 | 9.1690 |
| 809 | 0 | 0 | 0.8 | 0   | 0.8 | 0.929 | 0.876 | 6,214 | 9.1685 |
| 810 | 0 | 0 | 0.8 | 0   | 0.9 | 0.923 | 0.880 | 6,211 | 9.1679 |
| 811 | 0 | 0 | 0.8 | 0.1 | 0   | 0.947 | 0.856 | 6,231 | 9.1705 |
| 812 | 0 | 0 | 0.8 | 0.1 | 0.1 | 0.947 | 0.857 | 6,230 | 9.1705 |
| 813 | 0 | 0 | 0.8 | 0.1 | 0.2 | 0.945 | 0.858 | 6,229 | 9.1703 |
| 814 | 0 | 0 | 0.8 | 0.1 | 0.3 | 0.942 | 0.861 | 6,227 | 9.1700 |
| 815 | 0 | 0 | 0.8 | 0.1 | 0.4 | 0.940 | 0.864 | 6,224 | 9.1697 |
| 816 | 0 | 0 | 0.8 | 0.1 | 0.5 | 0.937 | 0.868 | 6,221 | 9.1694 |
| 817 | 0 | 0 | 0.8 | 0.1 | 0.6 | 0.932 | 0.872 | 6,217 | 9.1688 |
| 818 | 0 | 0 | 0.8 | 0.1 | 0.7 | 0.927 | 0.876 | 6,214 | 9.1683 |
| 819 | 0 | 0 | 0.8 | 0.1 | 0.8 | 0.920 | 0.880 | 6,211 | 9.1674 |
| 820 | 0 | 0 | 0.8 | 0.1 | 0.9 | 0.908 | 0.885 | 6,207 | 9.1661 |
| 821 | 0 | 0 | 0.8 | 0.2 | 0   | 0.945 | 0.858 | 6,229 | 9.1703 |
| 822 | 0 | 0 | 0.8 | 0.2 | 0.1 | 0.943 | 0.859 | 6,228 | 9.1701 |
| 823 | 0 | 0 | 0.8 | 0.2 | 0.2 | 0.939 | 0.862 | 6,226 | 9.1696 |
| 824 | 0 | 0 | 0.8 | 0.2 | 0.3 | 0.935 | 0.866 | 6,223 | 9.1691 |
| 825 | 0 | 0 | 0.8 | 0.2 | 0.4 | 0.930 | 0.869 | 6,220 | 9.1687 |
| 826 | 0 | 0 | 0.8 | 0.2 | 0.5 | 0.926 | 0.874 | 6,216 | 9.1681 |
| 827 | 0 | 0 | 0.8 | 0.2 | 0.6 | 0.919 | 0.879 | 6,212 | 9.1673 |
| 828 | 0 | 0 | 0.8 | 0.2 | 0.7 | 0.911 | 0.883 | 6,208 | 9.1664 |
| 829 | 0 | 0 | 0.8 | 0.2 | 0.8 | 0.900 | 0.888 | 6,204 | 9.1651 |
| 830 | 0 | 0 | 0.8 | 0.2 | 0.9 | 0.883 | 0.893 | 6,200 | 9.1631 |
| 831 | 0 | 0 | 0.8 | 0.3 | 0   | 0.945 | 0.858 | 6,229 | 9.1702 |
| 832 | 0 | 0 | 0.8 | 0.3 | 0.1 | 0.940 | 0.861 | 6,227 | 9.1697 |
| 833 | 0 | 0 | 0.8 | 0.3 | 0.2 | 0.933 | 0.865 | 6,223 | 9.1690 |
| 834 | 0 | 0 | 0.8 | 0.3 | 0.3 | 0.927 | 0.869 | 6,220 | 9.1683 |
| 835 | 0 | 0 | 0.8 | 0.3 | 0.4 | 0.921 | 0.873 | 6,217 | 9.1676 |

|     |   |   |     |     |     |       |       |       |        |
|-----|---|---|-----|-----|-----|-------|-------|-------|--------|
| 836 | 0 | 0 | 0.8 | 0.3 | 0.5 | 0.915 | 0.878 | 6,213 | 9.1668 |
| 837 | 0 | 0 | 0.8 | 0.3 | 0.6 | 0.905 | 0.883 | 6,208 | 9.1658 |
| 838 | 0 | 0 | 0.8 | 0.3 | 0.7 | 0.894 | 0.888 | 6,204 | 9.1645 |
| 839 | 0 | 0 | 0.8 | 0.3 | 0.8 | 0.879 | 0.893 | 6,200 | 9.1627 |
| 840 | 0 | 0 | 0.8 | 0.3 | 0.9 | 0.858 | 0.899 | 6,195 | 9.1600 |
| 841 | 0 | 0 | 0.8 | 0.4 | 0   | 0.944 | 0.859 | 6,229 | 9.1702 |
| 842 | 0 | 0 | 0.8 | 0.4 | 0.1 | 0.938 | 0.862 | 6,226 | 9.1695 |
| 843 | 0 | 0 | 0.8 | 0.4 | 0.2 | 0.929 | 0.867 | 6,222 | 9.1685 |
| 844 | 0 | 0 | 0.8 | 0.4 | 0.3 | 0.921 | 0.871 | 6,218 | 9.1676 |
| 845 | 0 | 0 | 0.8 | 0.4 | 0.4 | 0.912 | 0.875 | 6,215 | 9.1666 |
| 846 | 0 | 0 | 0.8 | 0.4 | 0.5 | 0.904 | 0.881 | 6,210 | 9.1656 |
| 847 | 0 | 0 | 0.8 | 0.4 | 0.6 | 0.892 | 0.886 | 6,205 | 9.1642 |
| 848 | 0 | 0 | 0.8 | 0.4 | 0.7 | 0.879 | 0.891 | 6,201 | 9.1626 |
| 849 | 0 | 0 | 0.8 | 0.4 | 0.8 | 0.861 | 0.896 | 6,197 | 9.1604 |
| 850 | 0 | 0 | 0.8 | 0.4 | 0.9 | 0.833 | 0.902 | 6,191 | 9.1570 |
| 851 | 0 | 0 | 0.8 | 0.5 | 0   | 0.944 | 0.859 | 6,229 | 9.1702 |
| 852 | 0 | 0 | 0.8 | 0.5 | 0.1 | 0.936 | 0.863 | 6,225 | 9.1693 |
| 853 | 0 | 0 | 0.8 | 0.5 | 0.2 | 0.925 | 0.868 | 6,221 | 9.1680 |
| 854 | 0 | 0 | 0.8 | 0.5 | 0.3 | 0.915 | 0.872 | 6,217 | 9.1669 |
| 855 | 0 | 0 | 0.8 | 0.5 | 0.4 | 0.905 | 0.877 | 6,213 | 9.1657 |
| 856 | 0 | 0 | 0.8 | 0.5 | 0.5 | 0.894 | 0.883 | 6,209 | 9.1644 |
| 857 | 0 | 0 | 0.8 | 0.5 | 0.6 | 0.880 | 0.888 | 6,204 | 9.1627 |
| 858 | 0 | 0 | 0.8 | 0.5 | 0.7 | 0.864 | 0.894 | 6,199 | 9.1608 |
| 859 | 0 | 0 | 0.8 | 0.5 | 0.8 | 0.843 | 0.899 | 6,194 | 9.1582 |
| 860 | 0 | 0 | 0.8 | 0.5 | 0.9 | 0.811 | 0.905 | 6,188 | 9.1541 |
| 861 | 0 | 0 | 0.8 | 0.6 | 0   | 0.944 | 0.859 | 6,229 | 9.1701 |
| 862 | 0 | 0 | 0.8 | 0.6 | 0.1 | 0.935 | 0.863 | 6,225 | 9.1691 |
| 863 | 0 | 0 | 0.8 | 0.6 | 0.2 | 0.921 | 0.868 | 6,220 | 9.1676 |
| 864 | 0 | 0 | 0.8 | 0.6 | 0.3 | 0.909 | 0.873 | 6,216 | 9.1662 |
| 865 | 0 | 0 | 0.8 | 0.6 | 0.4 | 0.897 | 0.878 | 6,212 | 9.1648 |
| 866 | 0 | 0 | 0.8 | 0.6 | 0.5 | 0.884 | 0.884 | 6,207 | 9.1633 |
| 867 | 0 | 0 | 0.8 | 0.6 | 0.6 | 0.868 | 0.890 | 6,202 | 9.1613 |
| 868 | 0 | 0 | 0.8 | 0.6 | 0.7 | 0.850 | 0.895 | 6,197 | 9.1591 |
| 869 | 0 | 0 | 0.8 | 0.6 | 0.8 | 0.827 | 0.900 | 6,193 | 9.1561 |
| 870 | 0 | 0 | 0.8 | 0.6 | 0.9 | 0.791 | 0.906 | 6,186 | 9.1513 |
| 871 | 0 | 0 | 0.8 | 0.7 | 0   | 0.944 | 0.859 | 6,229 | 9.1701 |
| 872 | 0 | 0 | 0.8 | 0.7 | 0.1 | 0.934 | 0.863 | 6,225 | 9.1690 |
| 873 | 0 | 0 | 0.8 | 0.7 | 0.2 | 0.918 | 0.869 | 6,220 | 9.1672 |
| 874 | 0 | 0 | 0.8 | 0.7 | 0.3 | 0.904 | 0.874 | 6,216 | 9.1656 |
| 875 | 0 | 0 | 0.8 | 0.7 | 0.4 | 0.890 | 0.879 | 6,211 | 9.1639 |
| 876 | 0 | 0 | 0.8 | 0.7 | 0.5 | 0.876 | 0.885 | 6,206 | 9.1623 |
| 877 | 0 | 0 | 0.8 | 0.7 | 0.6 | 0.858 | 0.891 | 6,201 | 9.1601 |

|     |   |   |     |     |     |       |       |       |        |
|-----|---|---|-----|-----|-----|-------|-------|-------|--------|
| 878 | 0 | 0 | 0.8 | 0.7 | 0.7 | 0.839 | 0.896 | 6,196 | 9.1576 |
| 879 | 0 | 0 | 0.8 | 0.7 | 0.8 | 0.813 | 0.901 | 6,191 | 9.1543 |
| 880 | 0 | 0 | 0.8 | 0.7 | 0.9 | 0.774 | 0.907 | 6,185 | 9.1489 |
| 881 | 0 | 0 | 0.8 | 0.8 | 0   | 0.944 | 0.859 | 6,228 | 9.1701 |
| 882 | 0 | 0 | 0.8 | 0.8 | 0.1 | 0.932 | 0.863 | 6,225 | 9.1689 |
| 883 | 0 | 0 | 0.8 | 0.8 | 0.2 | 0.915 | 0.869 | 6,220 | 9.1669 |
| 884 | 0 | 0 | 0.8 | 0.8 | 0.3 | 0.899 | 0.875 | 6,215 | 9.1651 |
| 885 | 0 | 0 | 0.8 | 0.8 | 0.4 | 0.884 | 0.880 | 6,211 | 9.1633 |
| 886 | 0 | 0 | 0.8 | 0.8 | 0.5 | 0.869 | 0.885 | 6,206 | 9.1614 |
| 887 | 0 | 0 | 0.8 | 0.8 | 0.6 | 0.850 | 0.891 | 6,200 | 9.1591 |
| 888 | 0 | 0 | 0.8 | 0.8 | 0.7 | 0.829 | 0.897 | 6,196 | 9.1564 |
| 889 | 0 | 0 | 0.8 | 0.8 | 0.8 | 0.802 | 0.902 | 6,190 | 9.1528 |
| 890 | 0 | 0 | 0.8 | 0.8 | 0.9 | 0.760 | 0.908 | 6,184 | 9.1470 |
| 891 | 0 | 0 | 0.8 | 0.9 | 0   | 0.944 | 0.859 | 6,228 | 9.1701 |
| 892 | 0 | 0 | 0.8 | 0.9 | 0.1 | 0.932 | 0.863 | 6,225 | 9.1688 |
| 893 | 0 | 0 | 0.8 | 0.9 | 0.2 | 0.913 | 0.869 | 6,219 | 9.1667 |
| 894 | 0 | 0 | 0.8 | 0.9 | 0.3 | 0.896 | 0.875 | 6,215 | 9.1647 |
| 895 | 0 | 0 | 0.8 | 0.9 | 0.4 | 0.881 | 0.880 | 6,210 | 9.1628 |
| 896 | 0 | 0 | 0.8 | 0.9 | 0.5 | 0.864 | 0.885 | 6,205 | 9.1609 |
| 897 | 0 | 0 | 0.8 | 0.9 | 0.6 | 0.844 | 0.892 | 6,200 | 9.1584 |
| 898 | 0 | 0 | 0.8 | 0.9 | 0.7 | 0.823 | 0.897 | 6,195 | 9.1556 |
| 899 | 0 | 0 | 0.8 | 0.9 | 0.8 | 0.794 | 0.902 | 6,190 | 9.1518 |
| 900 | 0 | 0 | 0.8 | 0.9 | 0.9 | 0.751 | 0.908 | 6,183 | 9.1457 |
| 901 | 0 | 0 | 0.9 | 0   | 0   | 0.944 | 0.863 | 6,225 | 9.1702 |
| 902 | 0 | 0 | 0.9 | 0   | 0.1 | 0.943 | 0.863 | 6,225 | 9.1701 |
| 903 | 0 | 0 | 0.9 | 0   | 0.2 | 0.942 | 0.865 | 6,224 | 9.1700 |
| 904 | 0 | 0 | 0.9 | 0   | 0.3 | 0.941 | 0.866 | 6,222 | 9.1698 |
| 905 | 0 | 0 | 0.9 | 0   | 0.4 | 0.939 | 0.869 | 6,220 | 9.1696 |
| 906 | 0 | 0 | 0.9 | 0   | 0.5 | 0.936 | 0.873 | 6,217 | 9.1693 |
| 907 | 0 | 0 | 0.9 | 0   | 0.6 | 0.933 | 0.877 | 6,214 | 9.1689 |
| 908 | 0 | 0 | 0.9 | 0   | 0.7 | 0.929 | 0.880 | 6,211 | 9.1685 |
| 909 | 0 | 0 | 0.9 | 0   | 0.8 | 0.925 | 0.884 | 6,208 | 9.1680 |
| 910 | 0 | 0 | 0.9 | 0   | 0.9 | 0.919 | 0.887 | 6,205 | 9.1673 |
| 911 | 0 | 0 | 0.9 | 0.1 | 0   | 0.942 | 0.864 | 6,224 | 9.1700 |
| 912 | 0 | 0 | 0.9 | 0.1 | 0.1 | 0.940 | 0.867 | 6,222 | 9.1697 |
| 913 | 0 | 0 | 0.9 | 0.1 | 0.2 | 0.937 | 0.869 | 6,220 | 9.1694 |
| 914 | 0 | 0 | 0.9 | 0.1 | 0.3 | 0.934 | 0.872 | 6,218 | 9.1691 |
| 915 | 0 | 0 | 0.9 | 0.1 | 0.4 | 0.932 | 0.875 | 6,215 | 9.1688 |
| 916 | 0 | 0 | 0.9 | 0.1 | 0.5 | 0.928 | 0.879 | 6,212 | 9.1684 |
| 917 | 0 | 0 | 0.9 | 0.1 | 0.6 | 0.923 | 0.884 | 6,208 | 9.1678 |
| 918 | 0 | 0 | 0.9 | 0.1 | 0.7 | 0.917 | 0.888 | 6,205 | 9.1672 |
| 919 | 0 | 0 | 0.9 | 0.1 | 0.8 | 0.909 | 0.892 | 6,201 | 9.1663 |

|     |   |   |     |     |     |       |       |       |        |
|-----|---|---|-----|-----|-----|-------|-------|-------|--------|
| 920 | 0 | 0 | 0.9 | 0.1 | 0.9 | 0.897 | 0.897 | 6,197 | 9.1648 |
| 921 | 0 | 0 | 0.9 | 0.2 | 0   | 0.939 | 0.867 | 6,222 | 9.1697 |
| 922 | 0 | 0 | 0.9 | 0.2 | 0.1 | 0.933 | 0.872 | 6,218 | 9.1689 |
| 923 | 0 | 0 | 0.9 | 0.2 | 0.2 | 0.927 | 0.876 | 6,214 | 9.1682 |
| 924 | 0 | 0 | 0.9 | 0.2 | 0.3 | 0.921 | 0.880 | 6,211 | 9.1676 |
| 925 | 0 | 0 | 0.9 | 0.2 | 0.4 | 0.916 | 0.883 | 6,208 | 9.1671 |
| 926 | 0 | 0 | 0.9 | 0.2 | 0.5 | 0.911 | 0.888 | 6,204 | 9.1664 |
| 927 | 0 | 0 | 0.9 | 0.2 | 0.6 | 0.903 | 0.893 | 6,200 | 9.1655 |
| 928 | 0 | 0 | 0.9 | 0.2 | 0.7 | 0.894 | 0.898 | 6,196 | 9.1645 |
| 929 | 0 | 0 | 0.9 | 0.2 | 0.8 | 0.882 | 0.903 | 6,192 | 9.1630 |
| 930 | 0 | 0 | 0.9 | 0.2 | 0.9 | 0.862 | 0.908 | 6,187 | 9.1606 |
| 931 | 0 | 0 | 0.9 | 0.3 | 0   | 0.939 | 0.867 | 6,221 | 9.1696 |
| 932 | 0 | 0 | 0.9 | 0.3 | 0.1 | 0.928 | 0.874 | 6,216 | 9.1683 |
| 933 | 0 | 0 | 0.9 | 0.3 | 0.2 | 0.919 | 0.880 | 6,211 | 9.1673 |
| 934 | 0 | 0 | 0.9 | 0.3 | 0.3 | 0.911 | 0.884 | 6,208 | 9.1664 |
| 935 | 0 | 0 | 0.9 | 0.3 | 0.4 | 0.903 | 0.888 | 6,204 | 9.1656 |
| 936 | 0 | 0 | 0.9 | 0.3 | 0.5 | 0.896 | 0.893 | 6,200 | 9.1647 |
| 937 | 0 | 0 | 0.9 | 0.3 | 0.6 | 0.885 | 0.899 | 6,195 | 9.1634 |
| 938 | 0 | 0 | 0.9 | 0.3 | 0.7 | 0.872 | 0.904 | 6,191 | 9.1619 |
| 939 | 0 | 0 | 0.9 | 0.3 | 0.8 | 0.855 | 0.909 | 6,186 | 9.1597 |
| 940 | 0 | 0 | 0.9 | 0.3 | 0.9 | 0.830 | 0.915 | 6,181 | 9.1566 |
| 941 | 0 | 0 | 0.9 | 0.4 | 0   | 0.938 | 0.868 | 6,221 | 9.1695 |
| 942 | 0 | 0 | 0.9 | 0.4 | 0.1 | 0.924 | 0.876 | 6,215 | 9.1679 |
| 943 | 0 | 0 | 0.9 | 0.4 | 0.2 | 0.912 | 0.882 | 6,209 | 9.1665 |
| 944 | 0 | 0 | 0.9 | 0.4 | 0.3 | 0.902 | 0.887 | 6,205 | 9.1654 |
| 945 | 0 | 0 | 0.9 | 0.4 | 0.4 | 0.892 | 0.891 | 6,201 | 9.1642 |
| 946 | 0 | 0 | 0.9 | 0.4 | 0.5 | 0.882 | 0.897 | 6,197 | 9.1630 |
| 947 | 0 | 0 | 0.9 | 0.4 | 0.6 | 0.868 | 0.903 | 6,192 | 9.1613 |
| 948 | 0 | 0 | 0.9 | 0.4 | 0.7 | 0.852 | 0.908 | 6,187 | 9.1594 |
| 949 | 0 | 0 | 0.9 | 0.4 | 0.8 | 0.831 | 0.913 | 6,182 | 9.1567 |
| 950 | 0 | 0 | 0.9 | 0.4 | 0.9 | 0.800 | 0.919 | 6,176 | 9.1525 |
| 951 | 0 | 0 | 0.9 | 0.5 | 0   | 0.938 | 0.868 | 6,221 | 9.1695 |
| 952 | 0 | 0 | 0.9 | 0.5 | 0.1 | 0.922 | 0.876 | 6,214 | 9.1677 |
| 953 | 0 | 0 | 0.9 | 0.5 | 0.2 | 0.907 | 0.883 | 6,208 | 9.1659 |
| 954 | 0 | 0 | 0.9 | 0.5 | 0.3 | 0.894 | 0.888 | 6,204 | 9.1644 |
| 955 | 0 | 0 | 0.9 | 0.5 | 0.4 | 0.882 | 0.893 | 6,199 | 9.1630 |
| 956 | 0 | 0 | 0.9 | 0.5 | 0.5 | 0.869 | 0.899 | 6,195 | 9.1614 |
| 957 | 0 | 0 | 0.9 | 0.5 | 0.6 | 0.852 | 0.905 | 6,189 | 9.1593 |
| 958 | 0 | 0 | 0.9 | 0.5 | 0.7 | 0.833 | 0.911 | 6,184 | 9.1570 |
| 959 | 0 | 0 | 0.9 | 0.5 | 0.8 | 0.809 | 0.916 | 6,179 | 9.1537 |
| 960 | 0 | 0 | 0.9 | 0.5 | 0.9 | 0.772 | 0.922 | 6,173 | 9.1487 |
| 961 | 0 | 0 | 0.9 | 0.6 | 0   | 0.938 | 0.868 | 6,221 | 9.1695 |



|      |   |     |     |     |     |       |       |       |        |
|------|---|-----|-----|-----|-----|-------|-------|-------|--------|
| 962  | 0 | 0   | 0.9 | 0.6 | 0.1 | 0.920 | 0.877 | 6,214 | 9.1675 |
| 963  | 0 | 0   | 0.9 | 0.6 | 0.2 | 0.902 | 0.884 | 6,208 | 9.1654 |
| 964  | 0 | 0   | 0.9 | 0.6 | 0.3 | 0.887 | 0.890 | 6,203 | 9.1636 |
| 965  | 0 | 0   | 0.9 | 0.6 | 0.4 | 0.872 | 0.895 | 6,198 | 9.1618 |
| 966  | 0 | 0   | 0.9 | 0.6 | 0.5 | 0.857 | 0.901 | 6,193 | 9.1600 |
| 967  | 0 | 0   | 0.9 | 0.6 | 0.6 | 0.838 | 0.907 | 6,188 | 9.1575 |
| 968  | 0 | 0   | 0.9 | 0.6 | 0.7 | 0.816 | 0.912 | 6,182 | 9.1547 |
| 969  | 0 | 0   | 0.9 | 0.6 | 0.8 | 0.788 | 0.918 | 6,177 | 9.1510 |
| 970  | 0 | 0   | 0.9 | 0.6 | 0.9 | 0.747 | 0.924 | 6,170 | 9.1450 |
| 971  | 0 | 0   | 0.9 | 0.7 | 0   | 0.938 | 0.868 | 6,221 | 9.1695 |
| 972  | 0 | 0   | 0.9 | 0.7 | 0.1 | 0.919 | 0.877 | 6,213 | 9.1673 |
| 973  | 0 | 0   | 0.9 | 0.7 | 0.2 | 0.898 | 0.885 | 6,207 | 9.1650 |
| 974  | 0 | 0   | 0.9 | 0.7 | 0.3 | 0.881 | 0.890 | 6,202 | 9.1629 |
| 975  | 0 | 0   | 0.9 | 0.7 | 0.4 | 0.864 | 0.896 | 6,197 | 9.1608 |
| 976  | 0 | 0   | 0.9 | 0.7 | 0.5 | 0.847 | 0.902 | 6,192 | 9.1587 |
| 977  | 0 | 0   | 0.9 | 0.7 | 0.6 | 0.826 | 0.908 | 6,186 | 9.1560 |
| 978  | 0 | 0   | 0.9 | 0.7 | 0.7 | 0.803 | 0.913 | 6,181 | 9.1529 |
| 979  | 0 | 0   | 0.9 | 0.7 | 0.8 | 0.772 | 0.919 | 6,175 | 9.1487 |
| 980  | 0 | 0   | 0.9 | 0.7 | 0.9 | 0.726 | 0.925 | 6,168 | 9.1419 |
| 981  | 0 | 0   | 0.9 | 0.8 | 0   | 0.938 | 0.868 | 6,221 | 9.1694 |
| 982  | 0 | 0   | 0.9 | 0.8 | 0.1 | 0.917 | 0.877 | 6,213 | 9.1672 |
| 983  | 0 | 0   | 0.9 | 0.8 | 0.2 | 0.895 | 0.885 | 6,207 | 9.1645 |
| 984  | 0 | 0   | 0.9 | 0.8 | 0.3 | 0.875 | 0.891 | 6,201 | 9.1622 |
| 985  | 0 | 0   | 0.9 | 0.8 | 0.4 | 0.857 | 0.896 | 6,197 | 9.1600 |
| 986  | 0 | 0   | 0.9 | 0.8 | 0.5 | 0.839 | 0.902 | 6,191 | 9.1577 |
| 987  | 0 | 0   | 0.9 | 0.8 | 0.6 | 0.816 | 0.908 | 6,186 | 9.1547 |
| 988  | 0 | 0   | 0.9 | 0.8 | 0.7 | 0.791 | 0.914 | 6,180 | 9.1513 |
| 989  | 0 | 0   | 0.9 | 0.8 | 0.8 | 0.758 | 0.920 | 6,174 | 9.1467 |
| 990  | 0 | 0   | 0.9 | 0.8 | 0.9 | 0.709 | 0.926 | 6,166 | 9.1394 |
| 991  | 0 | 0   | 0.9 | 0.9 | 0   | 0.938 | 0.868 | 6,221 | 9.1694 |
| 992  | 0 | 0   | 0.9 | 0.9 | 0.1 | 0.916 | 0.878 | 6,213 | 9.1671 |
| 993  | 0 | 0   | 0.9 | 0.9 | 0.2 | 0.892 | 0.885 | 6,206 | 9.1642 |
| 994  | 0 | 0   | 0.9 | 0.9 | 0.3 | 0.872 | 0.891 | 6,201 | 9.1618 |
| 995  | 0 | 0   | 0.9 | 0.9 | 0.4 | 0.853 | 0.897 | 6,196 | 9.1594 |
| 996  | 0 | 0   | 0.9 | 0.9 | 0.5 | 0.833 | 0.903 | 6,191 | 9.1570 |
| 997  | 0 | 0   | 0.9 | 0.9 | 0.6 | 0.809 | 0.909 | 6,185 | 9.1538 |
| 998  | 0 | 0   | 0.9 | 0.9 | 0.7 | 0.784 | 0.914 | 6,180 | 9.1503 |
| 999  | 0 | 0   | 0.9 | 0.9 | 0.8 | 0.749 | 0.920 | 6,173 | 9.1454 |
| 1000 | 0 | 0   | 0.9 | 0.9 | 0.9 | 0.698 | 0.926 | 6,165 | 9.1376 |
| 1001 | 0 | 0   | 0   | 0   | 0   | 0.962 | 0.807 | 6,270 | 9.1721 |
| 1002 | 0 | 0.1 | 0   | 0   | 0   | 0.962 | 0.807 | 6,270 | 9.1721 |
| 1003 | 0 | 0.2 | 0   | 0   | 0   | 0.962 | 0.807 | 6,270 | 9.1721 |

|      |     |     |   |   |   |       |       |       |        |
|------|-----|-----|---|---|---|-------|-------|-------|--------|
| 1004 | 0   | 0.3 | 0 | 0 | 0 | 0.962 | 0.807 | 6,270 | 9.1721 |
| 1005 | 0   | 0.4 | 0 | 0 | 0 | 0.962 | 0.806 | 6,271 | 9.1721 |
| 1006 | 0   | 0.5 | 0 | 0 | 0 | 0.963 | 0.801 | 6,275 | 9.1722 |
| 1007 | 0   | 0.6 | 0 | 0 | 0 | 0.964 | 0.797 | 6,279 | 9.1723 |
| 1008 | 0   | 0.7 | 0 | 0 | 0 | 0.964 | 0.793 | 6,282 | 9.1723 |
| 1009 | 0   | 0.8 | 0 | 0 | 0 | 0.964 | 0.790 | 6,284 | 9.1724 |
| 1010 | 0   | 0.9 | 0 | 0 | 0 | 0.965 | 0.789 | 6,285 | 9.1724 |
| 1011 | 0.1 | 0   | 0 | 0 | 0 | 0.962 | 0.807 | 6,270 | 9.1721 |
| 1012 | 0.1 | 0.1 | 0 | 0 | 0 | 0.962 | 0.807 | 6,270 | 9.1721 |
| 1013 | 0.1 | 0.2 | 0 | 0 | 0 | 0.962 | 0.807 | 6,270 | 9.1721 |
| 1014 | 0.1 | 0.3 | 0 | 0 | 0 | 0.962 | 0.807 | 6,270 | 9.1721 |
| 1015 | 0.1 | 0.4 | 0 | 0 | 0 | 0.962 | 0.806 | 6,271 | 9.1721 |
| 1016 | 0.1 | 0.5 | 0 | 0 | 0 | 0.963 | 0.801 | 6,275 | 9.1722 |
| 1017 | 0.1 | 0.6 | 0 | 0 | 0 | 0.964 | 0.797 | 6,279 | 9.1723 |
| 1018 | 0.1 | 0.7 | 0 | 0 | 0 | 0.964 | 0.793 | 6,282 | 9.1723 |
| 1019 | 0.1 | 0.8 | 0 | 0 | 0 | 0.964 | 0.790 | 6,284 | 9.1724 |
| 1020 | 0.1 | 0.9 | 0 | 0 | 0 | 0.965 | 0.788 | 6,286 | 9.1724 |
| 1021 | 0.2 | 0   | 0 | 0 | 0 | 0.962 | 0.807 | 6,270 | 9.1721 |
| 1022 | 0.2 | 0.1 | 0 | 0 | 0 | 0.962 | 0.807 | 6,270 | 9.1721 |
| 1023 | 0.2 | 0.2 | 0 | 0 | 0 | 0.962 | 0.807 | 6,270 | 9.1721 |
| 1024 | 0.2 | 0.3 | 0 | 0 | 0 | 0.962 | 0.807 | 6,270 | 9.1721 |
| 1025 | 0.2 | 0.4 | 0 | 0 | 0 | 0.962 | 0.806 | 6,271 | 9.1721 |
| 1026 | 0.2 | 0.5 | 0 | 0 | 0 | 0.963 | 0.801 | 6,275 | 9.1722 |
| 1027 | 0.2 | 0.6 | 0 | 0 | 0 | 0.964 | 0.797 | 6,279 | 9.1723 |
| 1028 | 0.2 | 0.7 | 0 | 0 | 0 | 0.964 | 0.792 | 6,282 | 9.1724 |
| 1029 | 0.2 | 0.8 | 0 | 0 | 0 | 0.965 | 0.788 | 6,286 | 9.1724 |
| 1030 | 0.2 | 0.9 | 0 | 0 | 0 | 0.965 | 0.785 | 6,288 | 9.1724 |
| 1031 | 0.3 | 0   | 0 | 0 | 0 | 0.962 | 0.807 | 6,270 | 9.1721 |
| 1032 | 0.3 | 0.1 | 0 | 0 | 0 | 0.962 | 0.807 | 6,270 | 9.1721 |
| 1033 | 0.3 | 0.2 | 0 | 0 | 0 | 0.962 | 0.807 | 6,270 | 9.1721 |
| 1034 | 0.3 | 0.3 | 0 | 0 | 0 | 0.962 | 0.807 | 6,270 | 9.1721 |
| 1035 | 0.3 | 0.4 | 0 | 0 | 0 | 0.962 | 0.805 | 6,272 | 9.1721 |
| 1036 | 0.3 | 0.5 | 0 | 0 | 0 | 0.963 | 0.800 | 6,276 | 9.1722 |
| 1037 | 0.3 | 0.6 | 0 | 0 | 0 | 0.964 | 0.793 | 6,282 | 9.1723 |
| 1038 | 0.3 | 0.7 | 0 | 0 | 0 | 0.965 | 0.785 | 6,288 | 9.1724 |
| 1039 | 0.3 | 0.8 | 0 | 0 | 0 | 0.965 | 0.780 | 6,292 | 9.1725 |
| 1040 | 0.3 | 0.9 | 0 | 0 | 0 | 0.965 | 0.777 | 6,294 | 9.1725 |
| 1041 | 0.4 | 0   | 0 | 0 | 0 | 0.963 | 0.804 | 6,273 | 9.1722 |
| 1042 | 0.4 | 0.1 | 0 | 0 | 0 | 0.963 | 0.804 | 6,273 | 9.1722 |
| 1043 | 0.4 | 0.2 | 0 | 0 | 0 | 0.963 | 0.804 | 6,273 | 9.1722 |
| 1044 | 0.4 | 0.3 | 0 | 0 | 0 | 0.963 | 0.803 | 6,273 | 9.1722 |
| 1045 | 0.4 | 0.4 | 0 | 0 | 0 | 0.964 | 0.798 | 6,278 | 9.1723 |

|      |     |     |   |   |   |       |       |       |        |
|------|-----|-----|---|---|---|-------|-------|-------|--------|
| 1046 | 0.4 | 0.5 | 0 | 0 | 0 | 0.965 | 0.787 | 6,287 | 9.1725 |
| 1047 | 0.4 | 0.6 | 0 | 0 | 0 | 0.966 | 0.774 | 6,297 | 9.1726 |
| 1048 | 0.4 | 0.7 | 0 | 0 | 0 | 0.967 | 0.766 | 6,304 | 9.1727 |
| 1049 | 0.4 | 0.8 | 0 | 0 | 0 | 0.967 | 0.761 | 6,308 | 9.1727 |
| 1050 | 0.4 | 0.9 | 0 | 0 | 0 | 0.968 | 0.759 | 6,309 | 9.1727 |
| 1051 | 0.5 | 0   | 0 | 0 | 0 | 0.966 | 0.792 | 6,283 | 9.1726 |
| 1052 | 0.5 | 0.1 | 0 | 0 | 0 | 0.966 | 0.792 | 6,283 | 9.1726 |
| 1053 | 0.5 | 0.2 | 0 | 0 | 0 | 0.966 | 0.792 | 6,283 | 9.1726 |
| 1054 | 0.5 | 0.3 | 0 | 0 | 0 | 0.966 | 0.788 | 6,286 | 9.1726 |
| 1055 | 0.5 | 0.4 | 0 | 0 | 0 | 0.968 | 0.775 | 6,296 | 9.1727 |
| 1056 | 0.5 | 0.5 | 0 | 0 | 0 | 0.970 | 0.752 | 6,315 | 9.1729 |
| 1057 | 0.5 | 0.6 | 0 | 0 | 0 | 0.971 | 0.738 | 6,327 | 9.1731 |
| 1058 | 0.5 | 0.7 | 0 | 0 | 0 | 0.971 | 0.731 | 6,332 | 9.1731 |
| 1059 | 0.5 | 0.8 | 0 | 0 | 0 | 0.972 | 0.727 | 6,335 | 9.1732 |
| 1060 | 0.5 | 0.9 | 0 | 0 | 0 | 0.972 | 0.725 | 6,337 | 9.1732 |
| 1061 | 0.6 | 0   | 0 | 0 | 0 | 0.969 | 0.775 | 6,297 | 9.1729 |
| 1062 | 0.6 | 0.1 | 0 | 0 | 0 | 0.969 | 0.775 | 6,297 | 9.1729 |
| 1063 | 0.6 | 0.2 | 0 | 0 | 0 | 0.970 | 0.774 | 6,297 | 9.1729 |
| 1064 | 0.6 | 0.3 | 0 | 0 | 0 | 0.971 | 0.760 | 6,308 | 9.1731 |
| 1065 | 0.6 | 0.4 | 0 | 0 | 0 | 0.973 | 0.723 | 6,338 | 9.1733 |
| 1066 | 0.6 | 0.5 | 0 | 0 | 0 | 0.975 | 0.696 | 6,360 | 9.1735 |
| 1067 | 0.6 | 0.6 | 0 | 0 | 0 | 0.976 | 0.684 | 6,370 | 9.1736 |
| 1068 | 0.6 | 0.7 | 0 | 0 | 0 | 0.976 | 0.679 | 6,374 | 9.1737 |
| 1069 | 0.6 | 0.8 | 0 | 0 | 0 | 0.977 | 0.676 | 6,377 | 9.1737 |
| 1070 | 0.6 | 0.9 | 0 | 0 | 0 | 0.977 | 0.674 | 6,378 | 9.1737 |
| 1071 | 0.7 | 0   | 0 | 0 | 0 | 0.973 | 0.756 | 6,312 | 9.1733 |
| 1072 | 0.7 | 0.1 | 0 | 0 | 0 | 0.973 | 0.756 | 6,312 | 9.1733 |
| 1073 | 0.7 | 0.2 | 0 | 0 | 0 | 0.974 | 0.747 | 6,319 | 9.1734 |
| 1074 | 0.7 | 0.3 | 0 | 0 | 0 | 0.977 | 0.690 | 6,365 | 9.1737 |
| 1075 | 0.7 | 0.4 | 0 | 0 | 0 | 0.980 | 0.637 | 6,408 | 9.1740 |
| 1076 | 0.7 | 0.5 | 0 | 0 | 0 | 0.981 | 0.618 | 6,423 | 9.1741 |
| 1077 | 0.7 | 0.6 | 0 | 0 | 0 | 0.981 | 0.610 | 6,430 | 9.1742 |
| 1078 | 0.7 | 0.7 | 0 | 0 | 0 | 0.982 | 0.606 | 6,433 | 9.1742 |
| 1079 | 0.7 | 0.8 | 0 | 0 | 0 | 0.982 | 0.603 | 6,435 | 9.1742 |
| 1080 | 0.7 | 0.9 | 0 | 0 | 0 | 0.982 | 0.602 | 6,436 | 9.1742 |
| 1081 | 0.8 | 0   | 0 | 0 | 0 | 0.977 | 0.731 | 6,332 | 9.1737 |
| 1082 | 0.8 | 0.1 | 0 | 0 | 0 | 0.977 | 0.731 | 6,332 | 9.1737 |
| 1083 | 0.8 | 0.2 | 0 | 0 | 0 | 0.981 | 0.647 | 6,400 | 9.1742 |
| 1084 | 0.8 | 0.3 | 0 | 0 | 0 | 0.985 | 0.545 | 6,482 | 9.1745 |
| 1085 | 0.8 | 0.4 | 0 | 0 | 0 | 0.986 | 0.515 | 6,506 | 9.1747 |
| 1086 | 0.8 | 0.5 | 0 | 0 | 0 | 0.987 | 0.505 | 6,515 | 9.1748 |
| 1087 | 0.8 | 0.6 | 0 | 0 | 0 | 0.987 | 0.500 | 6,518 | 9.1748 |

|      |     |     |   |   |   |       |       |       |        |
|------|-----|-----|---|---|---|-------|-------|-------|--------|
| 1088 | 0.8 | 0.7 | 0 | 0 | 0 | 0.987 | 0.497 | 6,520 | 9.1748 |
| 1089 | 0.8 | 0.8 | 0 | 0 | 0 | 0.987 | 0.496 | 6,522 | 9.1748 |
| 1090 | 0.8 | 0.9 | 0 | 0 | 0 | 0.987 | 0.495 | 6,522 | 9.1748 |
| 1091 | 0.9 | 0   | 0 | 0 | 0 | 0.982 | 0.697 | 6,360 | 9.1742 |
| 1092 | 0.9 | 0.1 | 0 | 0 | 0 | 0.986 | 0.591 | 6,445 | 9.1746 |
| 1093 | 0.9 | 0.2 | 0 | 0 | 0 | 0.992 | 0.380 | 6,615 | 9.1752 |
| 1094 | 0.9 | 0.3 | 0 | 0 | 0 | 0.993 | 0.339 | 6,648 | 9.1754 |
| 1095 | 0.9 | 0.4 | 0 | 0 | 0 | 0.993 | 0.328 | 6,657 | 9.1754 |
| 1096 | 0.9 | 0.5 | 0 | 0 | 0 | 0.994 | 0.323 | 6,661 | 9.1755 |
| 1097 | 0.9 | 0.6 | 0 | 0 | 0 | 0.994 | 0.321 | 6,663 | 9.1755 |
| 1098 | 0.9 | 0.7 | 0 | 0 | 0 | 0.994 | 0.320 | 6,664 | 9.1755 |
| 1099 | 0.9 | 0.8 | 0 | 0 | 0 | 0.994 | 0.319 | 6,664 | 9.1755 |
| 1100 | 0.9 | 0.9 | 0 | 0 | 0 | 0.994 | 0.319 | 6,664 | 9.1755 |

**Supplementary Table 2. One-way sensitivity analysis of intervention scenarios compared with the lower-cost non-dominated scenario with varying main sensitive parameters**

| Scenarios | Sen.  | Spe.  | Referral costs            |                           | Transition probability from referable DR to blindness |                     | Referral compliance |                   | Transition probability from non-referable DR to referable DR |                     | Treatment compliance |                   |
|-----------|-------|-------|---------------------------|---------------------------|-------------------------------------------------------|---------------------|---------------------|-------------------|--------------------------------------------------------------|---------------------|----------------------|-------------------|
|           |       |       | Lower limit (US\$ 136.63) | Upper limit (US\$ 204.95) | Lower limit (0.081)                                   | Upper limit (0.099) | Lower limit (45%)   | Upper limit (55%) | Lower limit (0.063)                                          | Upper limit (0.077) | Lower limit (63%)    | Upper limit (77%) |
| 8         | 0.936 | 0.873 |                           |                           |                                                       |                     |                     |                   |                                                              |                     |                      |                   |
| 9         | 0.944 | 0.863 |                           |                           |                                                       |                     |                     |                   |                                                              |                     |                      |                   |
| 10        | 0.947 | 0.856 |                           |                           |                                                       |                     |                     |                   |                                                              |                     |                      |                   |
| 11        | 0.951 | 0.847 |                           |                           |                                                       |                     |                     |                   |                                                              |                     |                      |                   |
| 12        | 0.954 | 0.837 |                           |                           |                                                       |                     |                     |                   |                                                              |                     |                      |                   |
| 13        | 0.958 | 0.824 |                           |                           |                                                       |                     |                     |                   |                                                              |                     |                      |                   |
| 14        | 0.963 | 0.804 |                           |                           |                                                       |                     |                     |                   |                                                              |                     |                      |                   |

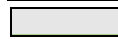 ICER < 1-time per capita GDP.

 ICER is 1-3 times per capita GDP.

 ICER > 3 times per capita GDP.

Sen. = Sensitivity, Spe. = Specificity. DR = diabetic retinopathy, ICER = incremental cost-effectiveness ratios, GDP = gross domestic product.

**Supplementary Table 3. Cost-effectiveness of AI-based DR screening with different model performance in rural and urban settings**

| Scenarios             | Sensitivity | Specificity | Cost per person (US\$) | Incr. Cost in 100,000 population (million US\$) | Effect per person (QALYs) | Incr. Eff (QALYs in 100,000 population) | ICER (US\$/QALY) | NMB (million US\$) |
|-----------------------|-------------|-------------|------------------------|-------------------------------------------------|---------------------------|-----------------------------------------|------------------|--------------------|
| <b>Rural settings</b> |             |             |                        |                                                 |                           |                                         |                  |                    |
| Status quo            | 0.933       | 0.877       | 6,111                  | ..                                              | 9.0972                    | ..                                      | ..               | ..                 |
| BCES                  | 0.947       | 0.856       | 6,132                  | 2.10                                            | 9.0984                    | 120                                     | 17,500           | 0.99               |
| <b>Urban settings</b> |             |             |                        |                                                 |                           |                                         |                  |                    |
| Status quo            | 0.933       | 0.877       | 6,274                  | ..                                              | 9.1920                    | ..                                      | ..               | ..                 |
| BCES                  | 0.969       | 0.775       | 6,360                  | 8.60                                            | 9.1961                    | 410                                     | 20,976           | 6.68               |

Sen. = sensitivity, Spe. = specificity, PPV = positive predictive value, NPV = negative predictive value, QALY = quality-adjusted life-year, BCES = best cost-effective scenario.

A total of 233,827 participants were registered with location information, including 24,229 (10.36%) from 80 rural regions and 209,598 (89.64%) from 168 urban regions. Among them, 1,309 (5.40%) participants from rural regions and 16,955 (8.09%) participants from urban regions were identified with referable DR.

**Supplementary Table 4. Cost-effectiveness of AI-based DR screening with different model performance in different age groups**

| Scenarios                   | Population      | Prevalence of referable DR | Mortality | Sensitivity | Specificity | Cost per person (US\$) | Incr. Cost in 100,000 population (million US\$) | Effect per person (QALYs) | Incr. Eff (QALYs in 100,000 population) | ICER (US\$/QALY) | NMB (million US\$) |
|-----------------------------|-----------------|----------------------------|-----------|-------------|-------------|------------------------|-------------------------------------------------|---------------------------|-----------------------------------------|------------------|--------------------|
| <b>Aged 20-29 years old</b> |                 |                            |           |             |             |                        |                                                 |                           |                                         |                  |                    |
| Status quo                  | 2,504 (1.02%)   | 6.60%                      | 0.033%,   | 0.933       | 0.877       | 18,226                 | ..                                              | 14.8081                   | ..                                      | ..               | ..                 |
| BCES                        |                 |                            | 0.039%    | 0.977       | 0.731       | 18,333                 | 10.74                                           | 14.8172                   | 904                                     | 11,878           | 17.14              |
| <b>Aged 30-39 years old</b> |                 |                            |           |             |             |                        |                                                 |                           |                                         |                  |                    |
| Status quo                  | 6,596 (2.70%)   | 7.20%                      | 0.051%,   | 0.933       | 0.877       | 17,470                 | ..                                              | 14.4958                   | ..                                      | ..               | ..                 |
| BCES                        |                 |                            | 0.078%    | 0.977       | 0.731       | 17,578                 | 10.84                                           | 14.5048                   | 895                                     | 12,117           | 16.74              |
| <b>Aged 40-49 years old</b> |                 |                            |           |             |             |                        |                                                 |                           |                                         |                  |                    |
| Status quo                  | 22,672 (9.28%)  | 9.22%                      | 0.125%,   | 0.933       | 0.877       | 15,752                 | ..                                              | 13.6888                   | ..                                      | ..               | ..                 |
| BCES                        |                 |                            | 0.194%    | 0.977       | 0.731       | 15,860                 | 10.88                                           | 13.6975                   | 868                                     | 12,529           | 15.89              |
| <b>Aged 50-59 years old</b> |                 |                            |           |             |             |                        |                                                 |                           |                                         |                  |                    |
| Status quo                  | 65,972 (27.00%) | 9.09%                      | 0.364%,   | 0.933       | 0.877       | 11,441                 | ..                                              | 11.9150                   | ..                                      | ..               | ..                 |
| BCES                        |                 |                            | 0.518%    | 0.973       | 0.756       | 11,536                 | 9.53                                            | 11.9218                   | 678                                     | 14,062           | 11.36              |
| <b>Aged 60-69 years old</b> |                 |                            |           |             |             |                        |                                                 |                           |                                         |                  |                    |
| Status quo                  | 86865 (35.55%)  | 7.98%                      | 0.854%,   | 0.933       | 0.877       | 6,261                  | ..                                              | 9.1595                    | ..                                      | ..               | ..                 |
| BCES                        |                 |                            | 1.421%    | 0.963       | 0.804       | 6,320                  | 5.86                                            | 9.1628                    | 335                                     | 17,488           | 4.47               |
| <b>Aged 70-79 years old</b> |                 |                            |           |             |             |                        |                                                 |                           |                                         |                  |                    |
| Status quo                  | 49,124 (20.10%) | 5.95%                      | 3.149%,   | 0.933       | 0.877       | 2,613                  | ..                                              | 5.9148                    | ..                                      | ..               | ..                 |
| BCES                        |                 |                            | 4.861%    | 0.947       | 0.856       | 2,628                  | 1.58                                            | 5.9156                    | 75                                      | 21,020           | 0.74               |
| <b>Aged 80-89 years old</b> |                 |                            |           |             |             |                        |                                                 |                           |                                         |                  |                    |
| Status quo                  | 10,612 (4.34%)  | 4.19%                      | 8.932%,   | 0.933       | 0.877       | 1,132                  | ..                                              | 3.5567                    | ..                                      | ..               | ..                 |
| BCES                        |                 |                            | 8.932%    | 0.933       | 0.877       | 1,132                  | 0.00                                            | 3.5567                    | 0                                       | ..               | 0.00               |

Sen. = sensitivity, Spe. = specificity, PPV = positive predictive value, NPV = negative predictive value, QALY = quality-adjusted life-year, BCES = best cost-effective scenario.

Mortalities were provided for the first five years and last five years in each age group (eg, mortalities for 20-24 and 25-29 years old were provided for the 20-29 subgroup).



**Supplementary Table 5. Criteria for quality control and DR grading according to the NHS guidelines**

| Classification         | Presence of Clinical Features                                                                                                                                      |
|------------------------|--------------------------------------------------------------------------------------------------------------------------------------------------------------------|
| <b>Quality Control</b> |                                                                                                                                                                    |
| Poor quality           | Any criterion of the following:<br>1) Vessels within 1 DD of the optic disc margin or macular fovea cannot be identified<br>2) $\geq 50\%$ of the area is obscured |
| Poor location          | Central of the image deviates from the optic disc or the macular fovea more than 2 DD                                                                              |
| <b>DR grading</b>      |                                                                                                                                                                    |
| R0                     | Does not meet any of the following criteria                                                                                                                        |
| R1                     | R1.1) Microaneurysm                                                                                                                                                |
|                        | R1.2) Retinal hemorrhage                                                                                                                                           |
|                        | R1.3) Hard Exudate                                                                                                                                                 |
|                        | R1.4) Cotton-wool spot                                                                                                                                             |
| R2                     | R2.1) Venous loops                                                                                                                                                 |
|                        | R2.2) Venous beading                                                                                                                                               |
|                        | R2.3) Venous reduplication                                                                                                                                         |
| R3s (stable)           | R2.4) Intraretinal microvascular abnormality                                                                                                                       |
|                        | R2.5) Multiple blot hemorrhages                                                                                                                                    |
|                        | R3s.1) Evidence for peripheral retinal photocoagulation and a stable condition after treatment                                                                     |
| R3a (active)           | R3s.2) Stable fibrous proliferation with or without tractional retinal detachment                                                                                  |
|                        | R3a.1) Neovascularization of the disc or neovascularization elsewhere in the retina                                                                                |
|                        | R3a.2) Preretinal hemorrhage or vitreous hemorrhage                                                                                                                |
|                        | R3a.3) Active fibrous proliferation with traction over the retina                                                                                                  |
|                        | R3a.4) Tractional retinal detachment                                                                                                                               |

DR = diabetic retinopathy; NHS = National Health Service; DD = disc diameter.

Images of poor quality or poor location will be classified as ungradable, otherwise as gradable.

Referable DR is defined as R2 or above.

**Supplementary Table 6. Parameter values for the cost-effectiveness analysis model**

| Parameters                                   | Base value | Range for one-way sensitivity analysis | Distributions used in the PSA | Data source                    |
|----------------------------------------------|------------|----------------------------------------|-------------------------------|--------------------------------|
| <b>Economic costs/person*year, (US\$)</b>    |            |                                        |                               |                                |
| <b>Screening costs</b>                       |            |                                        |                               |                                |
| AI screening                                 | \$10.65    | \$8.52-\$12.78                         | Gamma (384.16, 36.07)         |                                |
| <b>Medical costs</b>                         |            |                                        |                               |                                |
| Ophthalmic examination costs                 | \$185      | \$136.63-\$204.95                      | Gamma (384.16, 2.08)          | Our data                       |
| Initial treatment costs                      | \$2,252    | \$1801.80-\$2702.70                    | Gamma (384.16, 0.17)          |                                |
| Follow-up treatment costs                    | \$763      | \$610.40-\$915.60                      | Gamma (384.16, 0.50)          |                                |
| <b>Burden of blindness</b>                   |            |                                        |                               |                                |
| Initial blindness costs                      | \$8,920    | \$7,136-\$10,704                       | Gamma (384.16, 0.04)          | Tang et al., 2019 <sup>1</sup> |
| Follow-up blindness costs                    | \$3,604    | \$2,883-\$4,325                        | Gamma (384.16, 0.11)          |                                |
| <b>Transition probabilities</b>              |            |                                        |                               |                                |
| Non-referable DR to referable DR             | 0.07       | 0.063-0.077                            | Beta (357.20, 4745.64)        |                                |
| Referable DR to blindness                    | 0.09       | 0.081-0.099                            | Beta (349.50, 3533.79)        | Li, et al., 2023 <sup>2</sup>  |
| Treated referable DR to blindness            | 0.02       | 0.018-0.022                            | Beta (376.46, 18446.38)       |                                |
| <b>Mortality in general population</b>       |            |                                        |                               |                                |
| Aged 60-64 years                             | 0.854%     | -                                      | -                             |                                |
| Aged 65-69 years                             | 1.421%     | -                                      | -                             |                                |
| Aged 70-74 years                             | 3.149%     | -                                      | -                             | Zhang et al, 2016 <sup>3</sup> |
| Aged 75-79 years                             | 4.861%     | -                                      | -                             |                                |
| Aged ≥ 80 years                              | 8.932%     | -                                      | -                             |                                |
| <b>Increased mortality risk (Multiplier)</b> |            |                                        |                               |                                |
| DM and non-referable DR                      | 1.8        | -                                      | -                             |                                |
| Referable DR                                 | 1.76       | -                                      | -                             | Lin et al, 2023 <sup>4</sup>   |

|                                   |        |             |                       |                                                                  |
|-----------------------------------|--------|-------------|-----------------------|------------------------------------------------------------------|
| Treated referable DR              | 1.76   | -           | -                     |                                                                  |
| Blindness                         | 2.34   | -           | -                     |                                                                  |
| <b>Utility</b>                    |        |             |                       |                                                                  |
| non-referable DR                  | 0.87   | 0.783-0.957 | Beta (49.07, 7.33)    |                                                                  |
| Referable DR                      | 0.83   | 0.747-0.913 | Beta (64.48, 13.21)   | Lin et al., 2023 <sup>4</sup> , Liu et al., 2023 <sup>5</sup> ,  |
| Treated referable DR              | 0.85   | 0.765-0.935 | Beta (56.77, 10.02)   | Li, et al., 2023 <sup>2</sup> , Huang et al., 2022 <sup>6</sup>  |
| Blindness                         | 0.55   | 0.495-0.605 | Beta (172.32, 140.99) |                                                                  |
| <b>Model parameters</b>           |        |             |                       |                                                                  |
| Compliance to referral suggestion | 0.5    | 0.45-0.55   | Beta (191.58, 191.58) |                                                                  |
| Compliance to treatment           | 0.7    | 0.63-0.77   | Beta (114.55, 49.09)  |                                                                  |
| Willingness to pay (US\$)*        | 30,828 | -           | -                     | Our data, Li., 2022 <sup>7</sup> , Liu et al., 2023 <sup>5</sup> |
| Utility discount rate             | 3.50%  | -           | -                     |                                                                  |
| Medical cost discount rate        | 3.00%  | -           | -                     |                                                                  |

AI = artificial intelligence, DR = diabetic retinopathy, PSA = probabilistic sensitivity analysis, DM = diabetes mellitus. \*The willingness to pay level is determined according to three times the Chinese gross domestic product (GDP) per-capita in 2019 (US\$ 30,828).

**Supplementary Table 7. Screening costs associated with AI-based DR screening**

| Screening-related items    | Costs (US\$/year per participant) |
|----------------------------|-----------------------------------|
| Direct medical cost        | 3.52                              |
| Advertising                | 0.02                              |
| Imaging Equipment          | 0.52                              |
| Human resource for imaging | 2.77                              |
| Engineering Costs          | 0.21                              |
| Direct non-medical cost    | 1.45                              |
| Transportation             | 1.45                              |
| Indirect cost              | 5.68                              |
| Income loss                | 5.68                              |
| Total                      | 10.65                             |

AI = artificial intelligence DR = diabetic retinopathy.

The screening costs was calculated based on the Lifeline Express Program during 2016-2019, involving a total of 251,535 participants. Direct medical cost in screening included advertisement (US\$ 3,915 for the entire program), costs for imaging equipment, health personnel for imaging, and engineering costs for AI deployment. Based on our estimation, screening for one participant required around 10 minutes. Theoretically, six fundus cameras and health personnel responsible for image taking can screen around 288 participants per day. Fundus cameras used in the Lifeline Express were local devices in each screening sites and hospitals, therefore we estimate US\$ 21,749 per camera during the screening period. Payment for health personnel was about US\$ 28,999 annually. Engineering costs for AI deployment included model development, model running, and software platform maintenance, estimated as US\$ 0.214 per participant. Transportation fee was estimated for participants going to the nearest screenings site. Therefore, the total costs per person for screening was estimated to be US\$ 10.65.

**Supplementary Table 8. Details of medical costs and care for blindness**

| Costs (US\$/year per participant) | Referral                                | Treatment  |                 | Care for blindness |                 |
|-----------------------------------|-----------------------------------------|------------|-----------------|--------------------|-----------------|
|                                   | Definitive ophthalmic check examination | First year | Follow-up years | First year         | Follow-up years |
| Direct medical cost               | 133.88                                  | 2001.93    | 709.93          | 4,745.00           | -               |
| Personnel wage                    |                                         | 1.93       | 1.93            | 1.93               | -               |
| Examination                       | 131.95                                  | -          | -               | -                  | -               |
| Treatment                         | -                                       | 2,000.00   | 708.00          | -                  | -               |
| Direct non-medical cost           | 17.31                                   | 48.70      | 17.31           | 571.00             | -               |
| Transportation and food           | 17.31                                   | 48.70      | 17.31           | -                  | -               |
| Indirect cost                     | 34.10                                   | 201.61     | 35.76           | 3,604.00           | 3,604.00        |
| Income loss                       | 34.10                                   | 201.61     | 35.76           | -                  | -               |
| Total                             | 185.29                                  | 2,252.25   | 763.00          | 8,920.00           | 3,604.00        |

DR = Diabetic retinopathy, VEGF = vascular endothelial growth factor.

Costs for referral examination and treatment were estimated according to data from our hospital and published data from Beijing Tongren Hospital as referral sites in South and North China. One ophthalmologist was able to assess around 60 patients daily. Definitive ocular examination for suspect DR patients included examinations for visual acuity, slit lamp, intraocular pressure, pupil dilation, fundus photography, optic coherence tomography, and fluorescein fundus angiography. The examination costs were calculated based on the unified pricing of the basic medical service prices in Guangdong Province

([https://www.gz.gov.cn/gzybj/gkmlpt/content/7/7623/post\\_7623885.html#14462](https://www.gz.gov.cn/gzybj/gkmlpt/content/7/7623/post_7623885.html#14462)). Based on our field observation, one patient would take approximately 1/4 day to complete the referral procedure. So, the transportation and food costs as well as income loss of the patients and one accompanying family member were calculated accordingly.

Treatment for patients with referable DR involve scatter or pan retinal photocoagulation and anti-VEGF intra-vitreous injection at the first year. Patients would receive necessary anti-VEGF treatment according to disease progression at follow-ups. The annual economic burden per blind patient includes direct medical expenses for vision-rescue, direct nonmedical expenses for patient transportation and food, and indirect costs from income loss of accompanied family members in the first year. Only indirect costs are included for blindness care in the follow-up years. Costs are estimated according to data from Zhongshan Ophthalmic Centre and published data from Beijing Tongren Hospital, combining both rural and urban areas. Indirect costs consisted of one accompanying family member's wage loss according to time spent and per capita daily income in China <sup>1,5</sup>. Costs for blindness care included 53.2% direct medical costs, 6.4% direct non-medical costs, and 40.4% indirect costs regarding loss of labor resources for family members and low-vision services costs.

**Supplementary Table 9. Model parameters for rural and urban settings**

| Parameters                                | Rural settings |                                                                                                                                 | Urban settings |                                                                                                                                 |
|-------------------------------------------|----------------|---------------------------------------------------------------------------------------------------------------------------------|----------------|---------------------------------------------------------------------------------------------------------------------------------|
|                                           | Base value     | Reference                                                                                                                       | Base value     | Reference                                                                                                                       |
| <b>Economic costs/person*year, (US\$)</b> |                |                                                                                                                                 |                |                                                                                                                                 |
| <b>Screening costs</b>                    |                |                                                                                                                                 |                |                                                                                                                                 |
| AI screening                              | 8.00           |                                                                                                                                 | 12.59          |                                                                                                                                 |
| <b>Medical costs</b>                      |                |                                                                                                                                 |                |                                                                                                                                 |
| Ophthalmic examination costs              | 306            | Our data                                                                                                                        | 172            | Our data                                                                                                                        |
| Initial treatment costs                   | 2,274          |                                                                                                                                 | 2249           |                                                                                                                                 |
| Follow-up treatment costs                 | 882            |                                                                                                                                 | 748            |                                                                                                                                 |
| <b>Burden of blindness</b>                |                |                                                                                                                                 |                |                                                                                                                                 |
| Initial blindness costs                   | 8,920          | Tang et al., 2019 <sup>1</sup>                                                                                                  | 8,920.00       | Tang et al., 2019 <sup>1</sup>                                                                                                  |
| Follow-up blindness costs                 | 3,604          |                                                                                                                                 | 3,604.00       |                                                                                                                                 |
| <b>Transition probabilities</b>           |                |                                                                                                                                 |                |                                                                                                                                 |
| Healthy to referable DR                   | 0.07           |                                                                                                                                 | 0.07           |                                                                                                                                 |
| Referable DR to blindness                 | 0.09           | Li, et al., 2023 <sup>2</sup>                                                                                                   | 0.09           | Li, et al., 2023 <sup>2</sup>                                                                                                   |
| Treated referable DR to blindness         | 0.02           |                                                                                                                                 | 0.02           |                                                                                                                                 |
| <b>Mortality in healthy individuals</b>   |                |                                                                                                                                 |                |                                                                                                                                 |
| Aged 60-64 years                          | 0.854%         |                                                                                                                                 | 0.854%         |                                                                                                                                 |
| Aged 65-69 years                          | 1.421%         |                                                                                                                                 | 1.421%         |                                                                                                                                 |
| Aged 70-74 years                          | 3.149%         | Zhang et al, 2016 <sup>3</sup>                                                                                                  | 3.149%         | Zhang et al, 2016 <sup>3</sup>                                                                                                  |
| Aged 75-79 years                          | 4.861%         |                                                                                                                                 | 4.861%         |                                                                                                                                 |
| Aged 80-84 years                          | 8.932%         |                                                                                                                                 | 8.932%         |                                                                                                                                 |
| <b>Increased mortality risk</b>           |                |                                                                                                                                 |                |                                                                                                                                 |
| DM without referable DR                   | 1.8            |                                                                                                                                 | 1.8            |                                                                                                                                 |
| Referable DR                              | 1.76           | Lin et al, 2023 <sup>4</sup>                                                                                                    | 1.76           | Lin et al, 2023 <sup>4</sup>                                                                                                    |
| Treated referable DR                      | 1.76           |                                                                                                                                 | 1.76           |                                                                                                                                 |
| Blindness                                 | 2.34           |                                                                                                                                 | 2.34           |                                                                                                                                 |
| <b>Utility</b>                            |                |                                                                                                                                 |                |                                                                                                                                 |
| non-referable DR                          | 0.87           |                                                                                                                                 | 0.87           |                                                                                                                                 |
| Referable DR                              | 0.83           | Lin et al., 2023 <sup>4</sup> , Liu et al., 2023 <sup>5</sup> , Li, et al., 2023 <sup>2</sup> , Huang et al., 2022 <sup>6</sup> | 0.83           | Lin et al., 2023 <sup>4</sup> , Liu et al., 2023 <sup>5</sup> , Li, et al., 2023 <sup>2</sup> , Huang et al., 2022 <sup>6</sup> |
| Treated referable DR                      | 0.85           |                                                                                                                                 | 0.85           |                                                                                                                                 |
| Blindness                                 | 0.55           |                                                                                                                                 | 0.55           |                                                                                                                                 |
| <b>Model parameters</b>                   |                |                                                                                                                                 |                |                                                                                                                                 |
| Compliance to referral suggestion         | 33%            | Our data                                                                                                                        | 57%            | Liu et al., 2023 <sup>5</sup>                                                                                                   |
| Compliance to treatment                   | 50%            | Li., 2022 <sup>7</sup>                                                                                                          | 75%            | Li., 2022 <sup>7</sup> , Liu et al., 2023 <sup>5</sup>                                                                          |
| Willingness to pay (US\$)*                | \$25,751       | -                                                                                                                               | \$37,259       | -                                                                                                                               |
| Utility discount rate                     | 3.50%          | -                                                                                                                               | 3.50%          | -                                                                                                                               |
| Medical cost discount rate                | 3.00%          | -                                                                                                                               | 3.00%          | -                                                                                                                               |

AI = artificial intelligence, DR = diabetic retinopathy. \*The willingness to pay level is determined according to three times the Chinese gross domestic product (GDP) per-capita in rural regions (US\$ 25,751) and urban regions (US\$ 37,259) in 2019.

**Supplementary Table 10. Detailed screening and medical-related costs in rural and urban settings**

| Costs (US\$/year per participant)         | Rural settings | Urban settings |
|-------------------------------------------|----------------|----------------|
| <b>Screening costs</b>                    |                |                |
| Direct medical cost                       | 0.88           | 0.88           |
| Advertising                               |                | 0.02           |
| Imaging Equipment                         |                | 0.52           |
| Human resource for imaging                |                | 2.77           |
| Engineering Costs                         |                | 0.21           |
| Direct non-medical cost                   | 1.45           | 1.45           |
| Transportation                            |                | 1.45           |
| Indirect cost                             | 3.04           | 7.62           |
| Income loss                               |                | 3.04           |
| Total screening costs                     | 8.00           | 12.59          |
| <b>Referral costs</b>                     |                |                |
| Direct medical cost                       | 133.88         | 133.88         |
| Personnel wage                            |                | 1.93           |
| Examination                               |                | 131.95         |
| Direct non-medical cost                   | 141.22         | 1.45           |
| Transportation and food                   |                | 141.22         |
| Indirect cost                             | 30.49          | 36.43          |
| Income loss                               |                | 30.49          |
| Total referral costs                      | 305.59         | 171.76         |
| <b>Treatment costs in the first year</b>  |                |                |
| Direct medical cost                       | 2001.93        | 2001.93        |
| Personnel wage                            |                | 1.93           |
| Treatment                                 |                | 2,000.00       |
| Direct non-medical cost                   | 162.97         | 34.07          |
| Transportation and food                   |                | 162.97         |
| Indirect cost                             | 109.30         | 213.43         |
| Income loss                               |                | 109.30         |
| Total treatment costs in the first year   | 2,274.21       | 2,249.44       |
| <b>Treatment costs in follow-up years</b> |                |                |
| Direct medical cost                       | 709.93         | 709.93         |
| Personnel wage                            |                | 1.93           |
| Examination and treatment                 |                | 708.00         |
| Direct non-medical cost                   | 141.22         | 1.45           |
| Transportation and food                   |                | 141.22         |
| Indirect cost                             | 30.49          | 36.43          |
| Income loss                               |                | 30.49          |
| Total treatment costs in follow-up years  | 881.65         | 747.82         |

Costs were calculated based on actual running costs of the Lifeline Express Program and data from our hospital as a referral site of this program. We assume that participants in rural regions would spend more time and economic cost on transportation to the referral hospital than those in urban regions.

Participants in urban regions would experience higher income loss than those in rural regions according to per capita daily income in different regions.



## Supplementary Figures

Supplementary Figure 1. ROC and optimal cut-off point of the AI in detecting referable DR

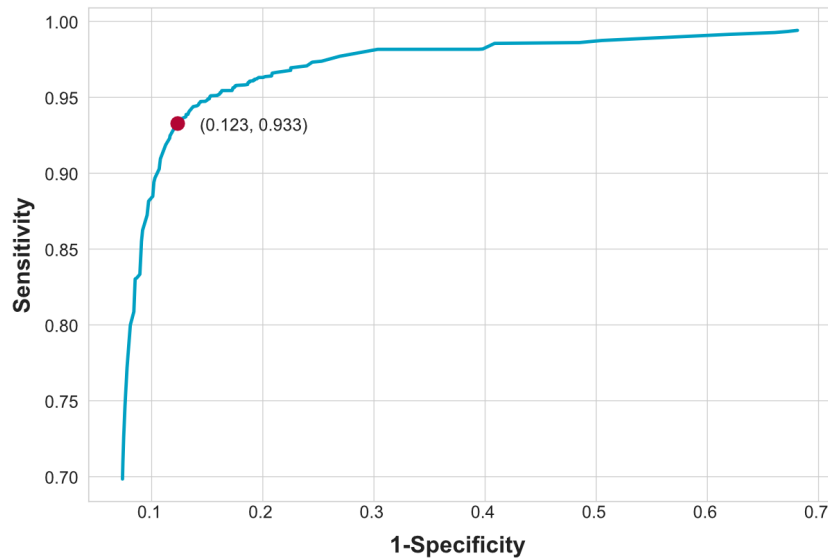

ROC = receiver operating characteristic, AI = artificial intelligence, DR = diabetic retinopathy. The ROC was plotted by varying the diagnostic thresholds of the AI. The optimal cutoff point was determined through Youden's J statistic, at a sensitivity level of 93.3% and specificity level of 87.7%.

**Supplementary Figure 2. Workflow of selecting cost-saving and cost-effective scenarios**

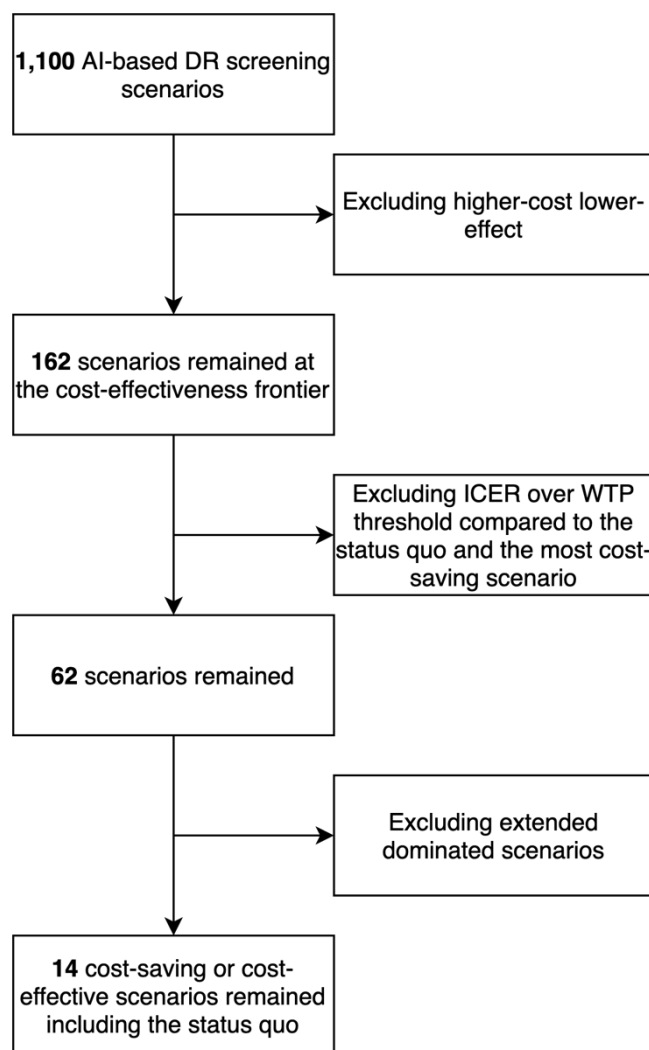

AI = artificial intelligence, DR = diabetic retinopathy, ICER = incremental cost-effectiveness ratio, WTP = willingness-to-pay.

In the population of Lifeline Express, the prevalence of referable DR was 7.44%, and the willingness-to-pay level was determined as 3-time per-capita GDP (US\$ 30,828). Excluding higher-cost lower effect was performed as follow: sorting all the 1,100 screening scenarios by ascending costs, then excluding those exhibiting higher costs but lower effectiveness compared to the previous lower-cost scenario. The cost-effectiveness frontier consists of the set of points corresponding to screening scenarios that are having incremental costs and effectiveness. Extended dominated scenario represents the scenario which has an ICER that is greater than that of a more effective scenario. The decision maker prefers the more effective intervention with a lower incremental cost-effectiveness ratio.

**Supplementary Figure 3. Cost-effective analysis under 1,100 different performances of the AI**

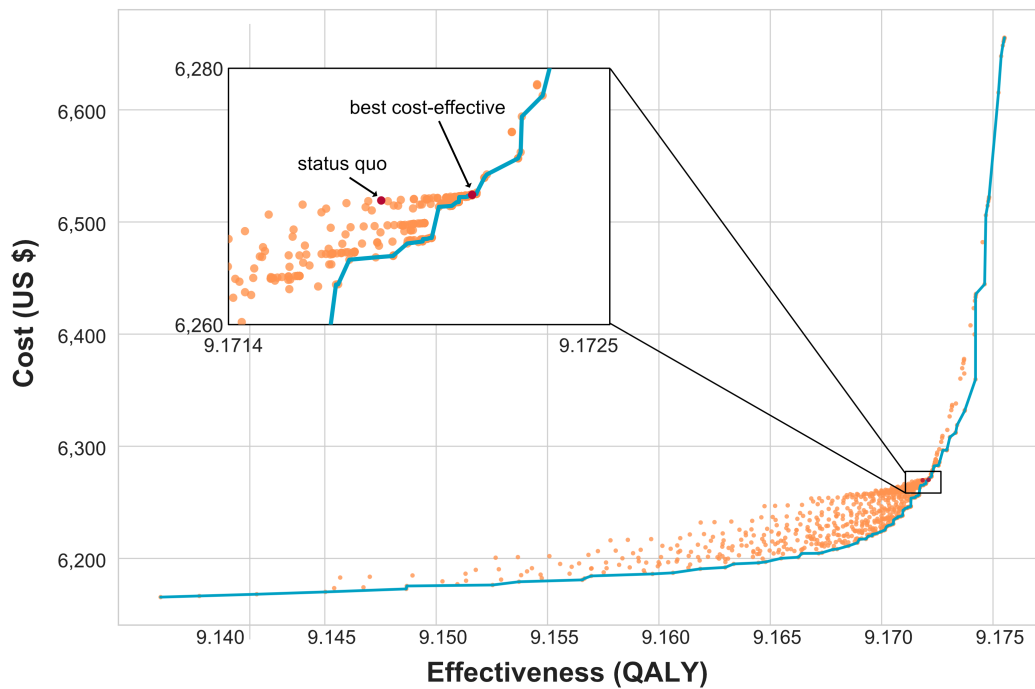

AI = artificial intelligence, DR = diabetic retinopathy, ICER = incremental cost-effectiveness ratio. A total of 1,100 AI-based DR screening scenarios under different model performances of the AI were simulated in cost-effectiveness analysis. Orange dots represent scenarios with different model performances of the AI. Blue lines indicate scenarios with increasing costs and increasing effects. Red circles mark the status quo (most accurate AI) and the best cost-effective scenario.

Supplementary Figure 4. Cost-effectiveness acceptability curve for screening strategies with different AI model performances

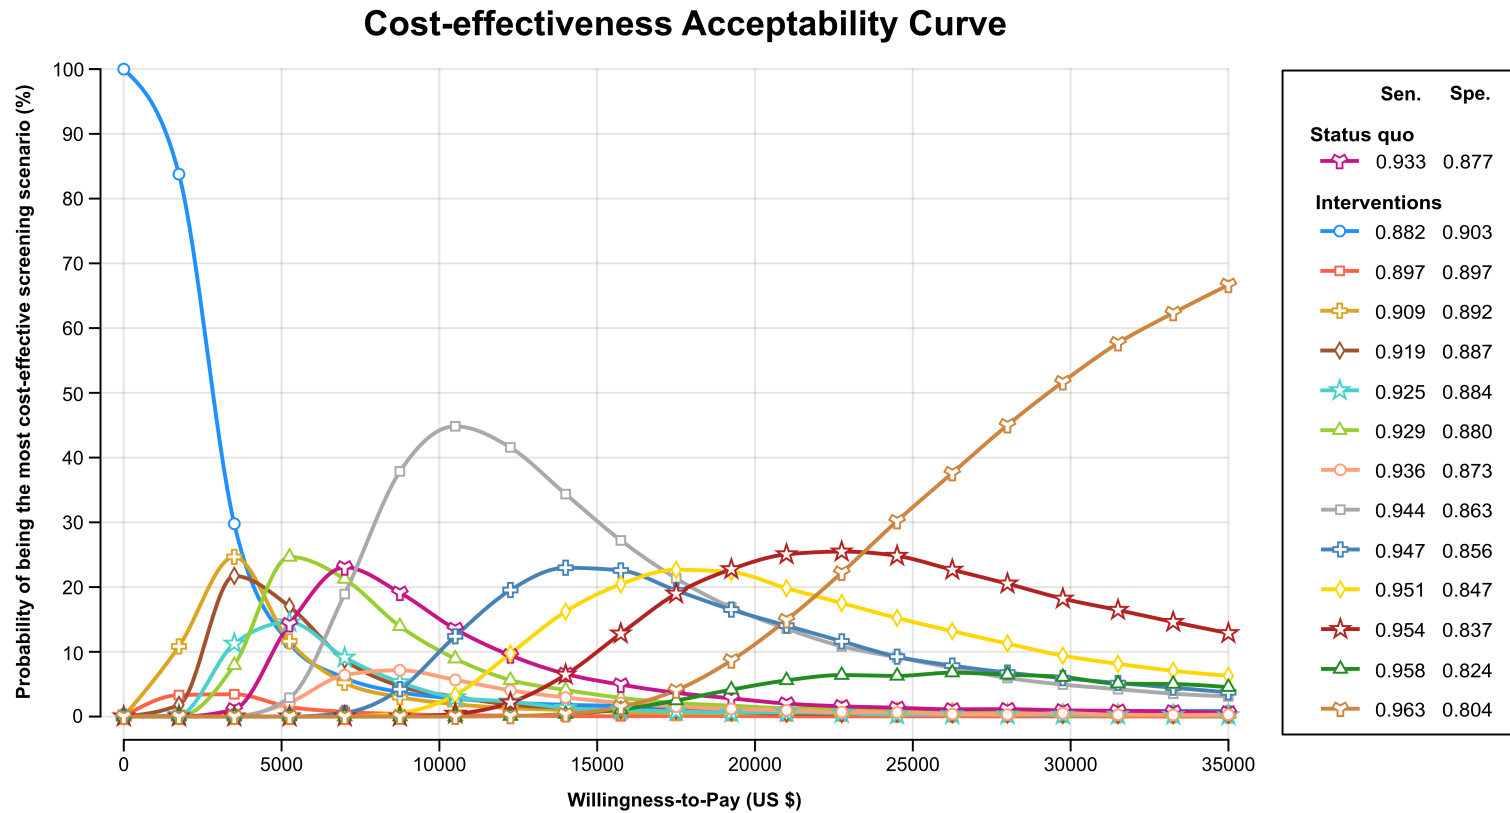

AI = artificial intelligence, Sen = sensitivity, Spe. = specificity.

Costs are given in US dollars. These curves show the cost-effective probabilities of diabetic retinopathy screening scenarios using different AI performances. The acceptability curves were derived through 10,000 Monte Carlo simulations. At a willingness-to-pay level of US\$ 30,828, the scenarios with AI performance at 96.3% sensitivity and 80.4% specificity was the dominant strategy in 55.43% of simulations. As WTP decreased, the best cost-effective AI would be replaced by one with lower

sensitivity. At a willingness-to-pay level of one time per capita GDP (US\$ 10,276), the best cost-effective AI model would have a sensitivity of 94.4% and a specificity of 86.3%. For cost-saving purposes (WTP less than around US\$3,000), a less sensitive AI model (88.2% sensitivity and 90.3% specificity) would be the dominant choice.

Supplementary Figure 5. Markov model

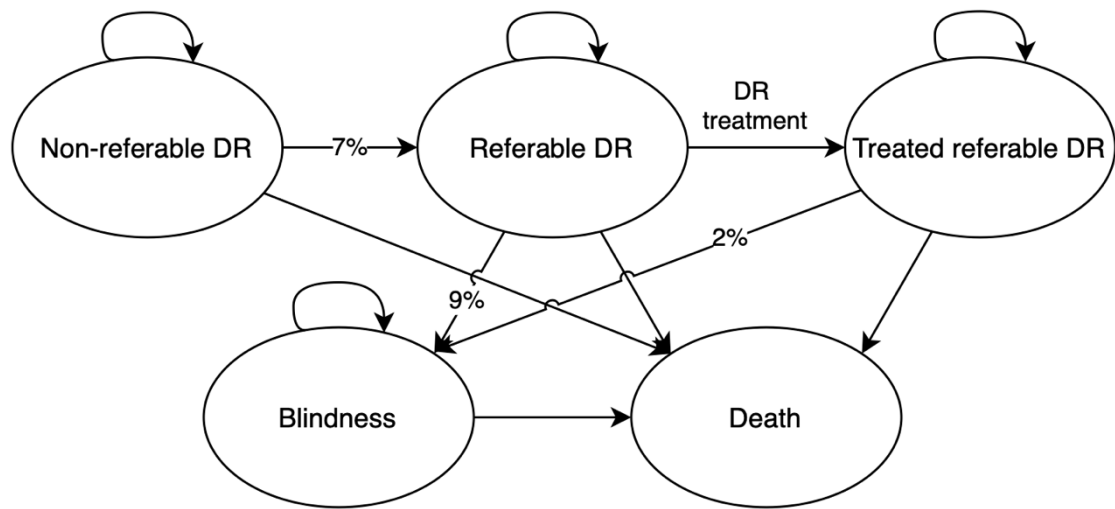

DR = diabetic retinopathy.

All states can transit to the death state. The transition probability to death was determined by the age-related mortality rate among the general population and hazard ratios of mortality in different disease states in the Chinese population<sup>3</sup>.

**Supplementary Figure 6. Threshold adjustment of the AI: an example**

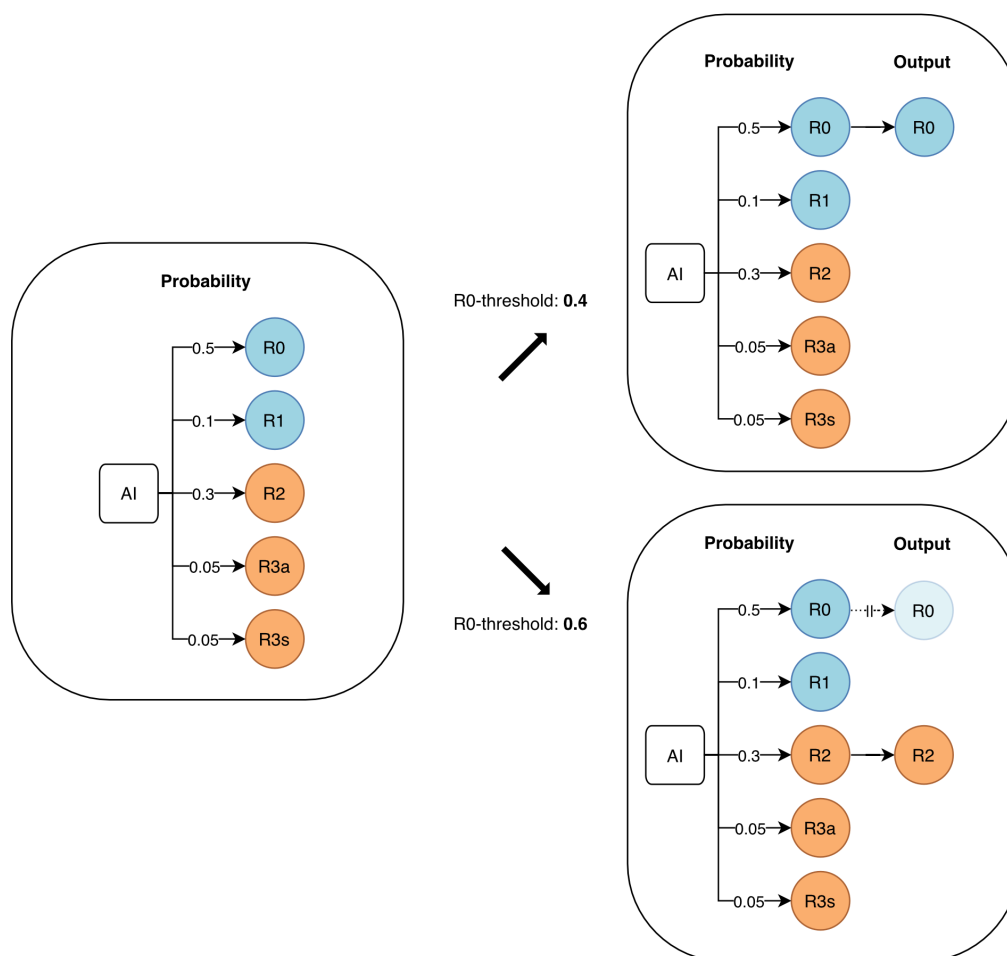

AI = artificial intelligence, DR = diabetic retinopathy.

The multi-classification AI assigns a probability to each DR grade (R0, R1, R2, R3s and R3a). Non-referable DR includes R0 and R1 grades, while referable DR includes R2, R3a and R3s. The original decision rule of the AI is to select the grade with the highest probability as the output grade. To adjust the diagnostic performance of the AI, we set different decision thresholds for each grade. Only grades with a probability above the threshold are considered activated. Blue circles represent non-referable DR and orange circles represent referable DR. In this example, we set two thresholds for R0 at 0.4 and 0.6, respectively, while thresholds for other classes remain zero. In the upper case, the highest probability class, R0, has a probability of 0.5 that passes the threshold of 0.4; thus, the final output is R0. In the lower circumstance where the threshold of R0 increases to 0.6, R0 fails the threshold requirement and is considered deactivated. As such, the AI model will scroll down to the grade with the next highest probability and repeat the threshold checking until an activated output grade is found (in this example, R2).

## References

1. Tang, J., Liang, Y., O'Neill, C., Kee, F., Jiang, J., *et al.* Cost-effectiveness and cost-utility of population-based glaucoma screening in China: a decision-analytic Markov model. *Lancet Glob Health* **7**, e968-e978 (2019).
2. Li, H., Zheng, Y., Xie, P., Ng, T.K., Qiu, K., *et al.* Cost-effectiveness analysis of telemedicine and artificial intelligence-based diabetic retinopathy screening in urban and rural China. (2023).
3. Zhang, W. & Wei, M. The evaluation of the mortality and life expectancy of Chinese population. *Population Journal* **38**, 18-28 (2016).
4. Lin, S., Ma, Y., Xu, Y., Lu, L., He, J., *et al.* Artificial Intelligence in Community-Based Diabetic Retinopathy Telemedicine Screening in Urban China: Cost-effectiveness and Cost-Utility Analyses With Real-world Data. *JMIR Public Health Surveill* **9**, e41624 (2023).
5. Liu, H., Li, R., Zhang, Y., Zhang, K., Yusufu, M., *et al.* Economic evaluation of combined population-based screening for multiple blindness-causing eye diseases in China: a cost-effectiveness analysis. *Lancet Glob Health* **11**, e456-e465 (2023).
6. Huang, X.M., Yang, B.F., Zheng, W.L., Liu, Q., Xiao, F., *et al.* Cost-effectiveness of artificial intelligence screening for diabetic retinopathy in rural China. *BMC Health Serv Res* **22**, 260 (2022).
7. Li, R., Yang, Z., Zhang, Y., Bai, W., Du, Y., *et al.* Cost-effectiveness and cost-utility of traditional and telemedicine combined population-based age-related macular degeneration and diabetic retinopathy screening in rural and urban China. *Lancet Reg Health West Pac* **23**, 100435 (2022).
